# Supplementary material
Source: Elsevier journal article supplement (https://univ-rennes.hal.science/hal-01532174v1/file/mmc1.pdf)
Supplement: mmc1 [file mmc1.pdf]

## Supplementary Material

### nickel(II) and copper(II) complexes of new unsymmetrically-substituted tetradentate Schiff base ligands: Spectral, structural, electrochemical and computational studies

Jonathan Cisterna, Vania Artigas, Mauricio Fuentealba, Paul Hamon, Carolina Manzur, Vincent Dorcet, Jean-René Hamon\*, David Carrillo\*

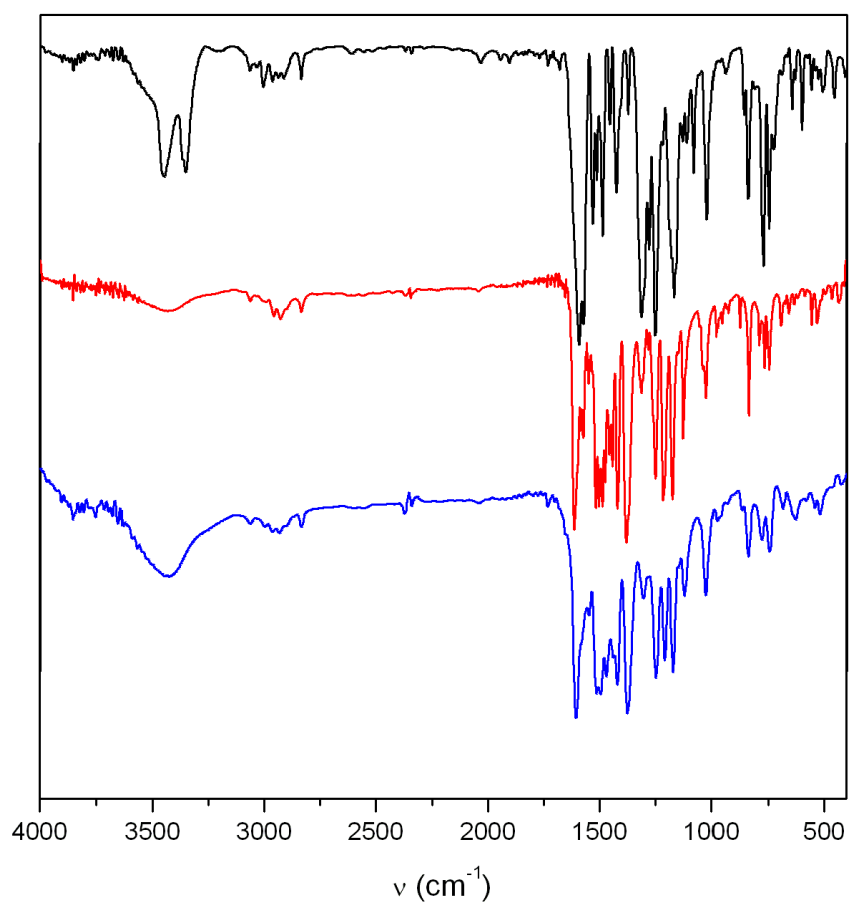

**Fig. S1** Solid-state FT-IR spectra of compounds **1** (top), **4** (middle) and **5**(bottom)

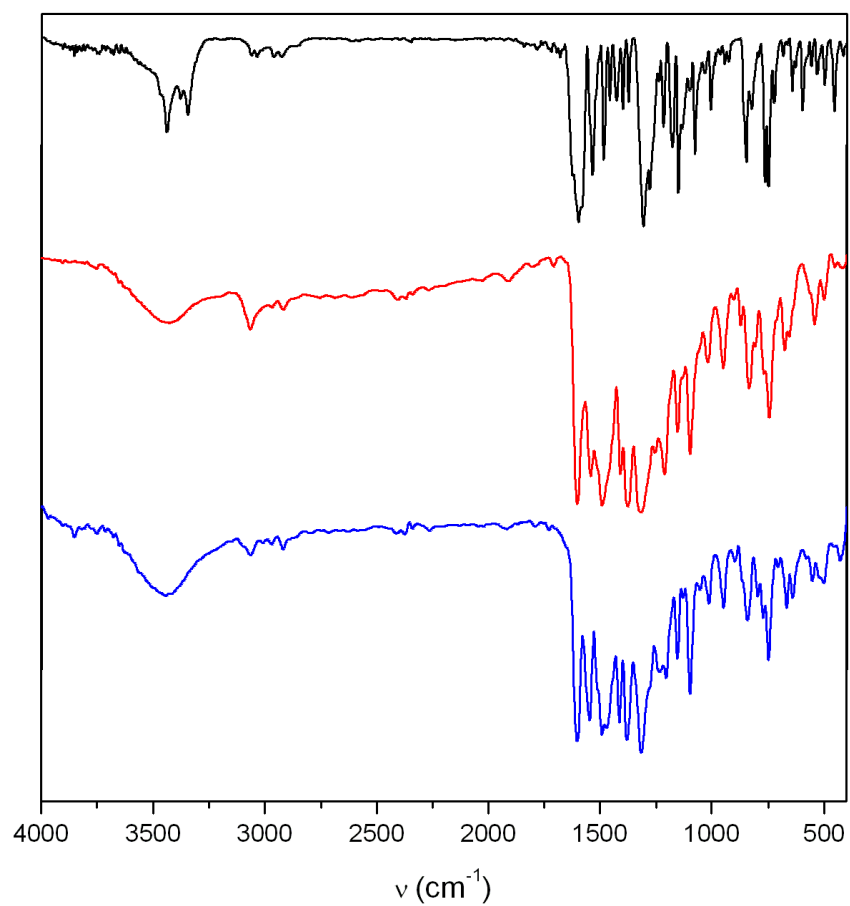

**Fig. S2** Solid-state FT-IR spectra of compounds **2**(top), **10** (middle) and **11** (bottom).

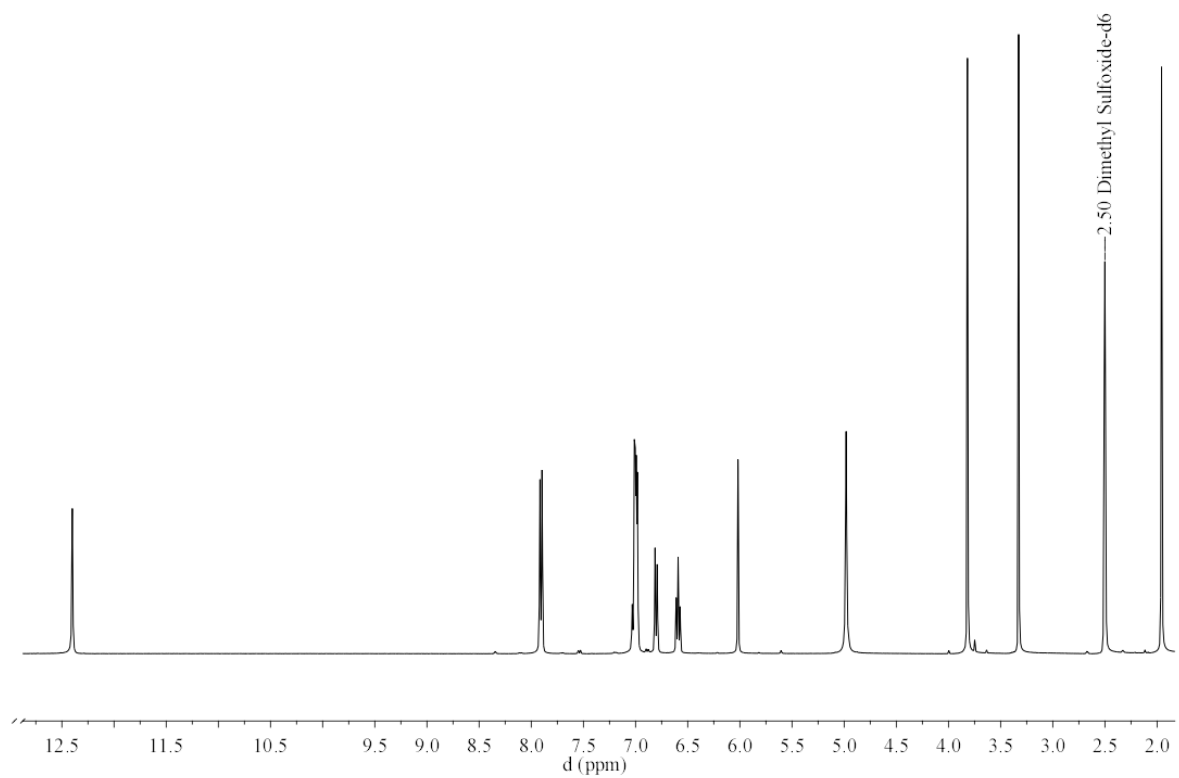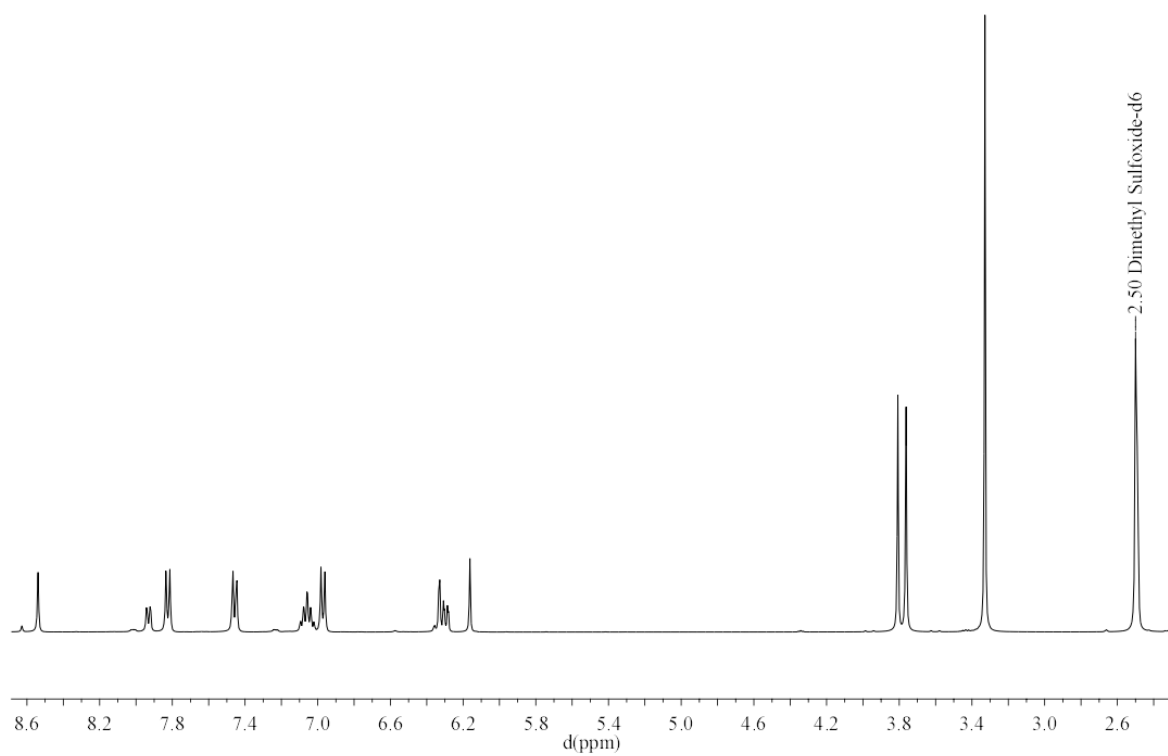

**Fig. S3**  $^1\text{H}$  NMR spectra of compounds **1** (top) and **4** (bottom) recorded in  $\text{DMSO-}d_6$  at 298 K

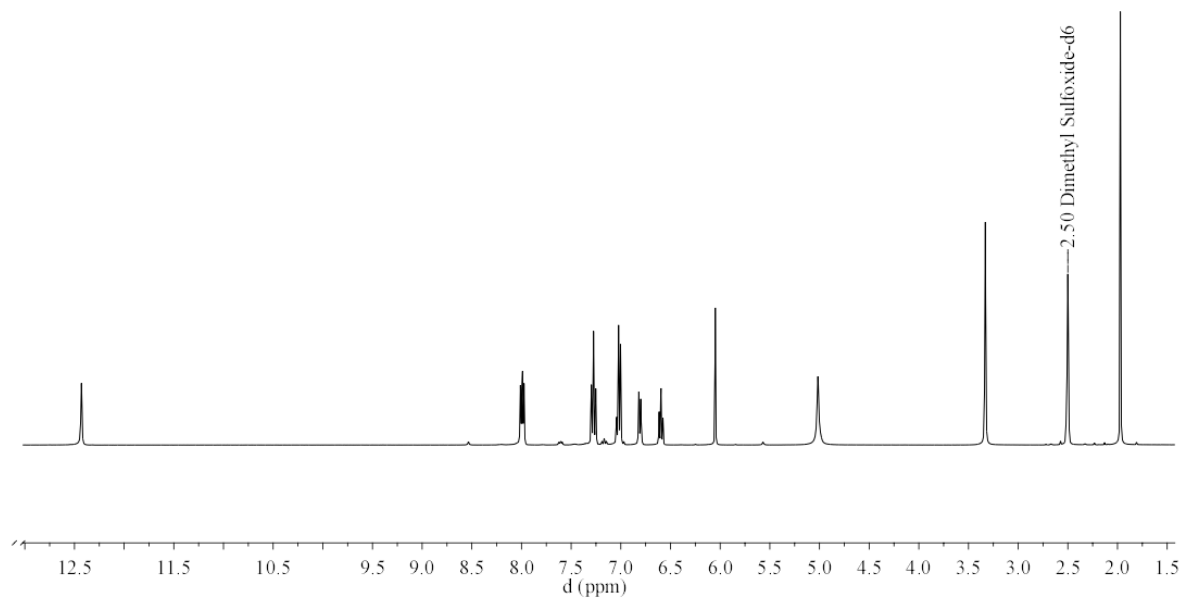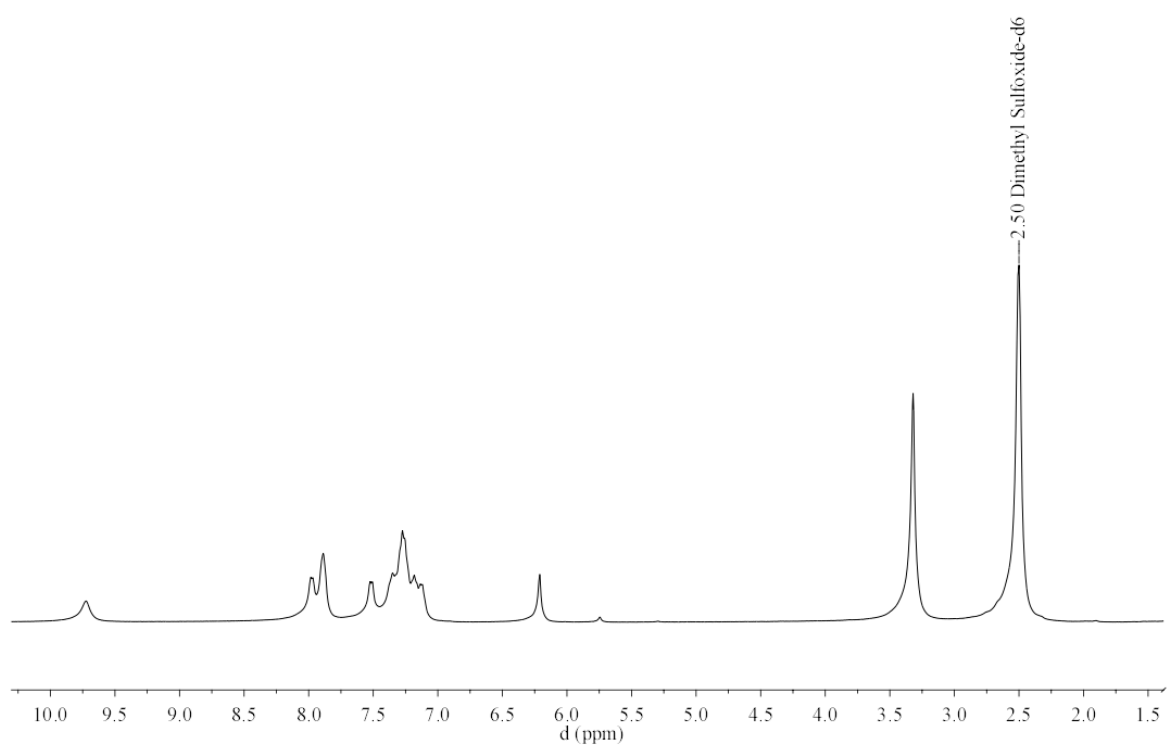

**Fig. S4**  $^1\text{H}$  NMR spectra of compounds **2** (top) and **8** (bottom) recorded in  $\text{DMSO-}d_6$  at 298 K

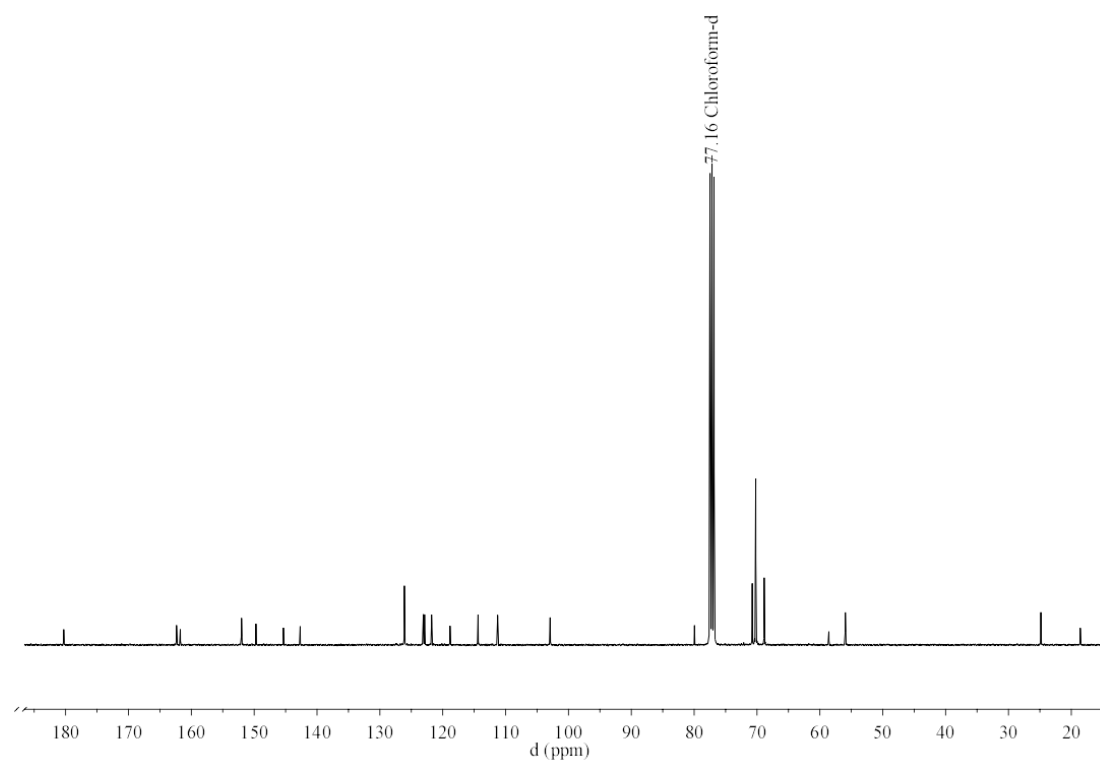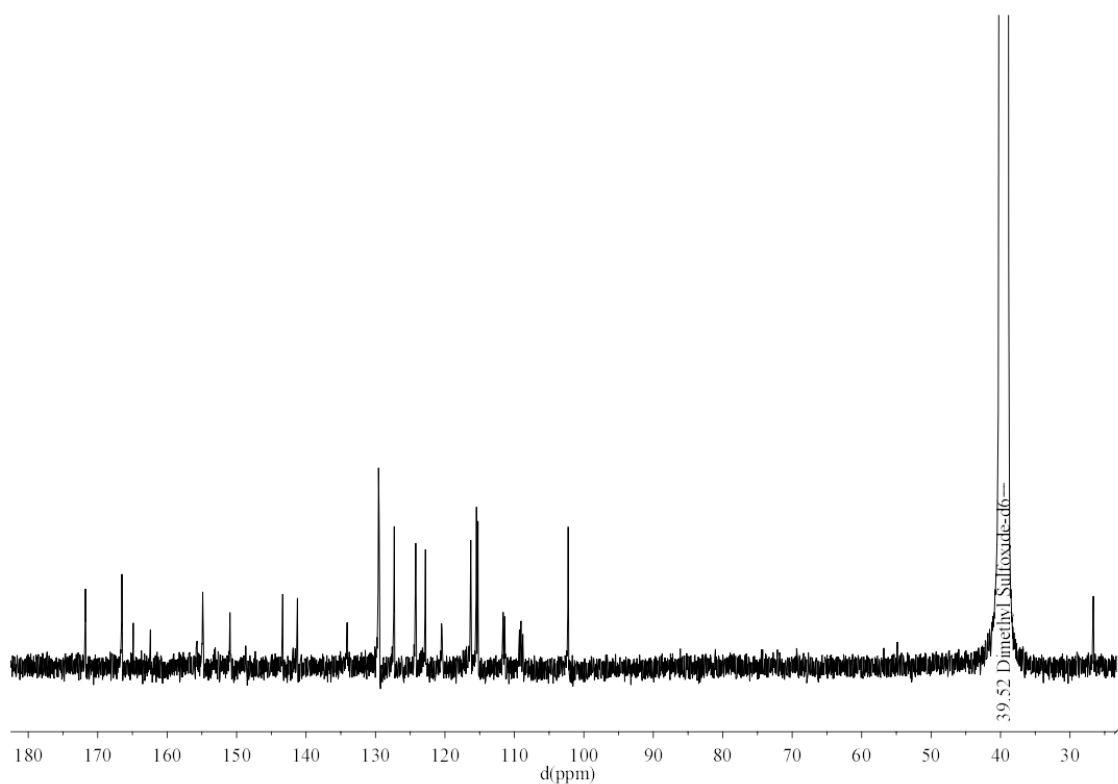

**Fig. S5**  $^{13}\text{C}\{^1\text{H}\}$  NMR spectra of compounds **6** (top) recorded in  $\text{CDCl}_3$  and **8** (bottom) recorded in  $\text{DMSO}-d_6$ , both at 298 K

Centre régional de mesures physiques de l'Ouest (CRMPO) - RAPPORT D'ANALYSE

Analysis Info  
Analysis Name D:\Data\CRMPO\ESI\_4888\_MS\_01.d  
Method CRMPO\_tune\_low.m  
Sample Name JC 013  
Comment J-R. HAMON JC 013 Solvant : CH3OH/CH2Cl2 (90/10)

Acquisition Date 02/08/2016 5:16:16 PM  
Operator Fabian LAMBERT  
Instrument maXis

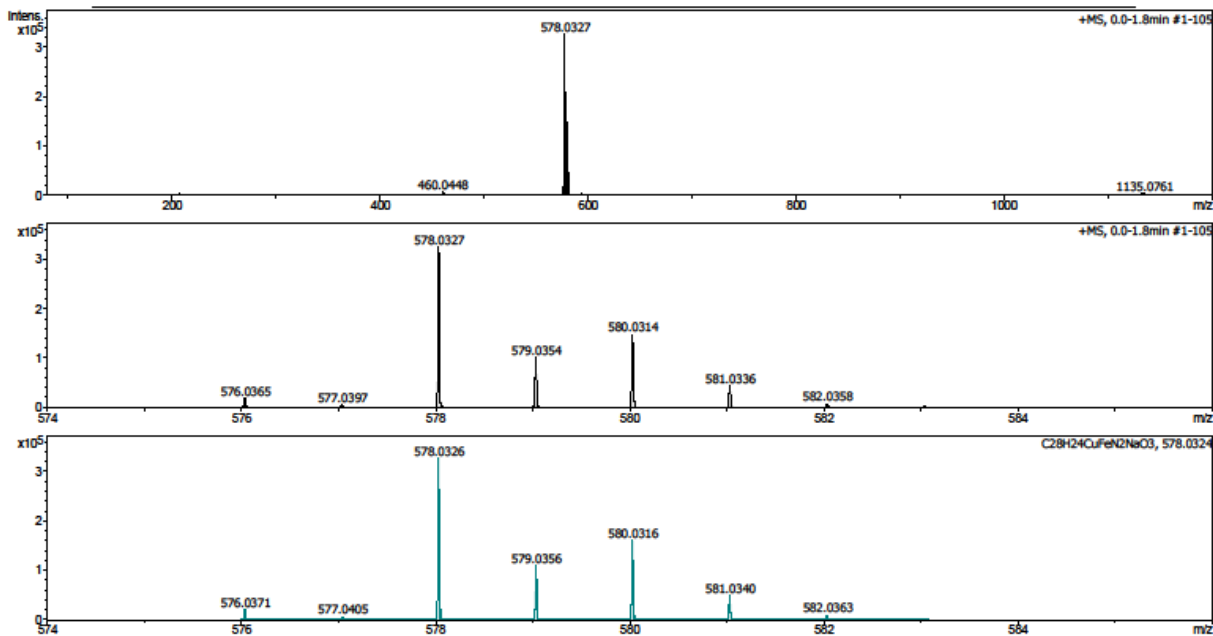

**Fig. S6** Mass spectral data of **7**: full spectrum (top), experimental molecular ion peak (middle) and simulated molecular ion peak (bottom)

Centre régional de mesures physiques de l'Ouest (CRMPO) - RAPPORT D'ANALYSE

|               |                                                  |                  |                       |
|---------------|--------------------------------------------------|------------------|-----------------------|
| Analysis Info |                                                  | Acquisition Date | 10/13/2015 3:38:59 PM |
| Analysis Name | D:\Data\CRMPO\ESI_4173_MS_02.d                   | Operator         | Fabian LAMBERT        |
| Method        | CRMPO_tune_low.m                                 | Instrument       | maxis                 |
| Sample Name   | JC 010                                           |                  |                       |
| Comment       | J-R. HAMON JC 010 Solvant : CH3CN/CH2Cl2 (90/10) |                  |                       |

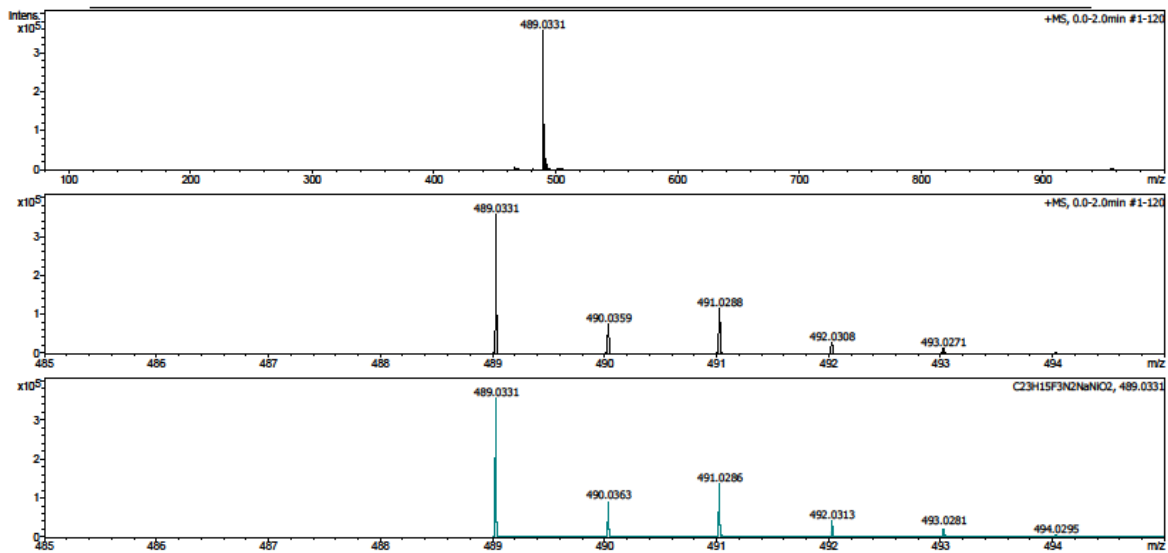

**Fig. S7** Mass spectral data of **8**: full spectrum (top), experimental molecular ion peak (middle) and simulated molecular ion peak (bottom)

Centre régional de mesures physiques de l'Ouest (CRMPO) - RAPPORT D'ANALYSE

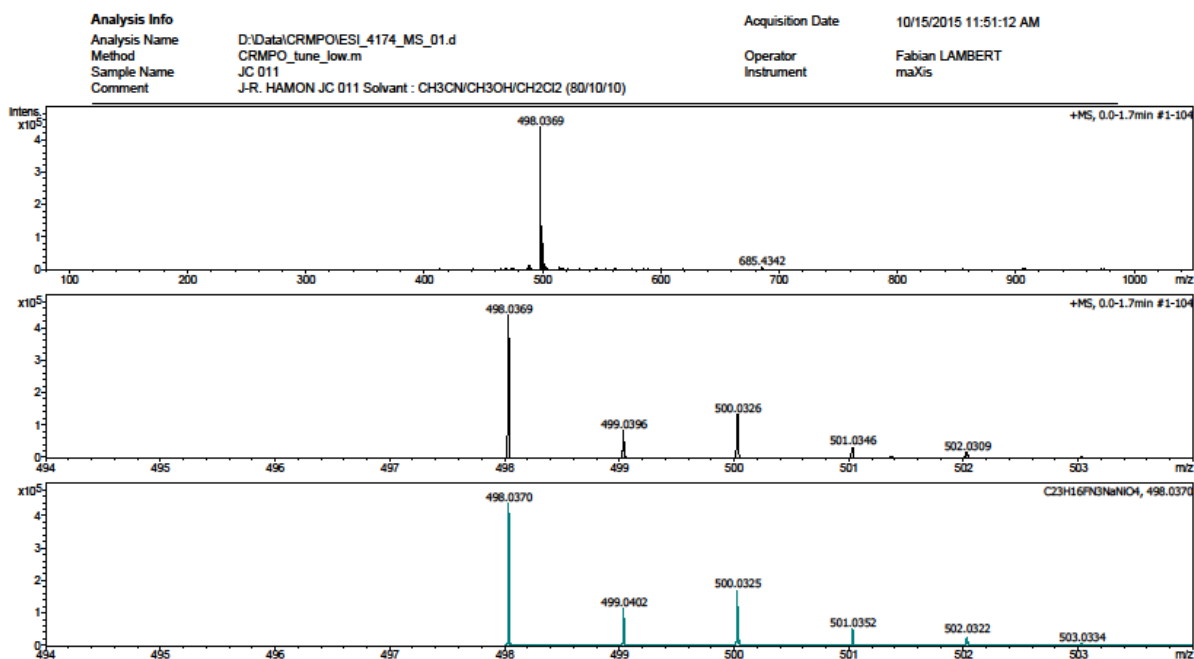

**Fig. S8** Mass spectral data of **10**: full spectrum (top), experimental molecular ion peak (middle) and simulated molecular ion peak (bottom)

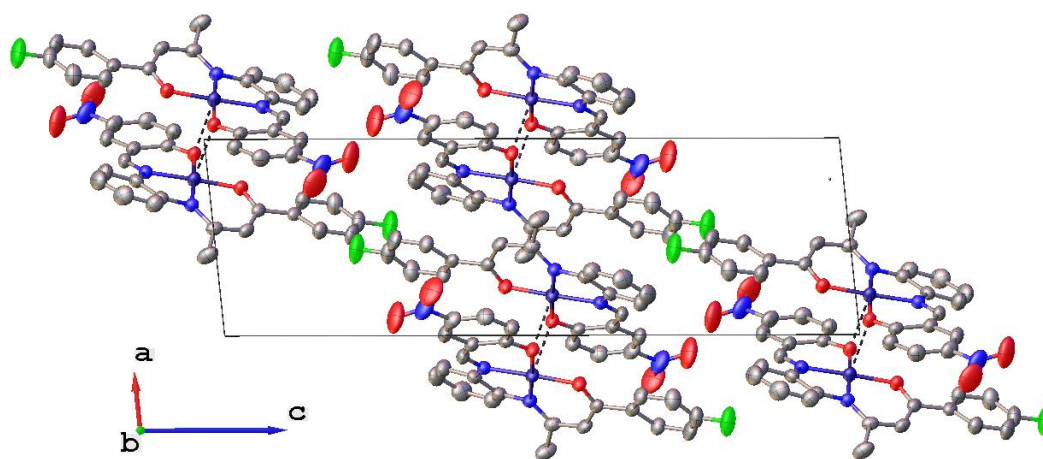

**Fig. S9** Packing diagram of **11** showing the arrangement of the dimeric units in the lattice. Hydrogen atoms have been omitted for clarity.



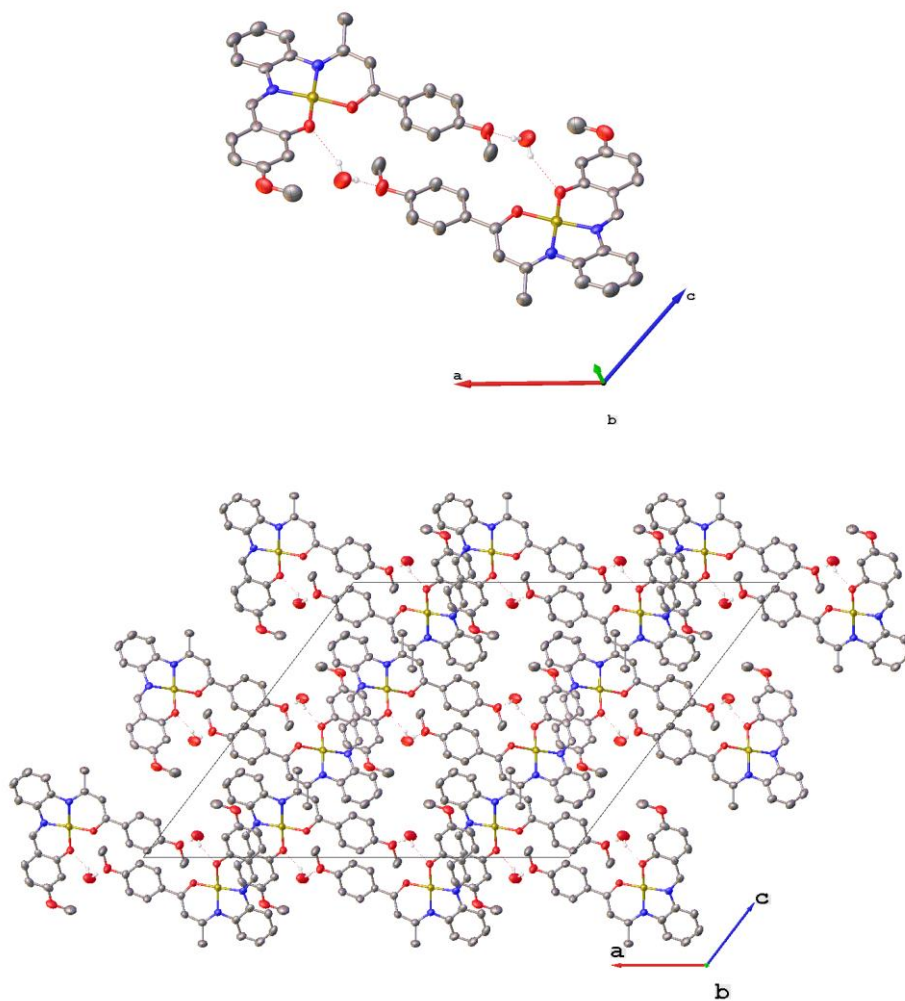

**Fig. S10** Packing diagram of  $4 \cdot \text{H}_2\text{O}$  showing the hydrogen bonding interactions implying the water crystallization molecules. All other hydrogen atoms have been omitted for clarity.

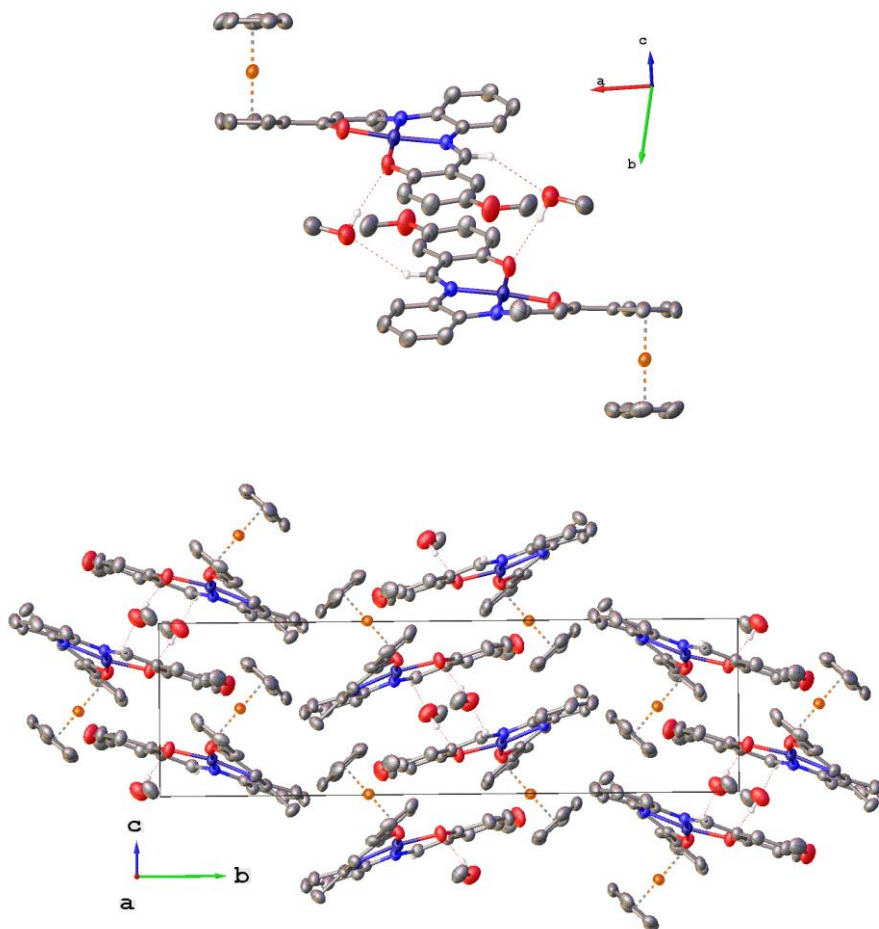

**Fig. S11** Packing diagram of  $7 \cdot \text{CH}_3\text{OH}$  showing the hydrogen bonds between the methanol crystallization solvent and phenolato oxygens of the Schiff base complexes. All other hydrogen atoms have been omitted for clarity.

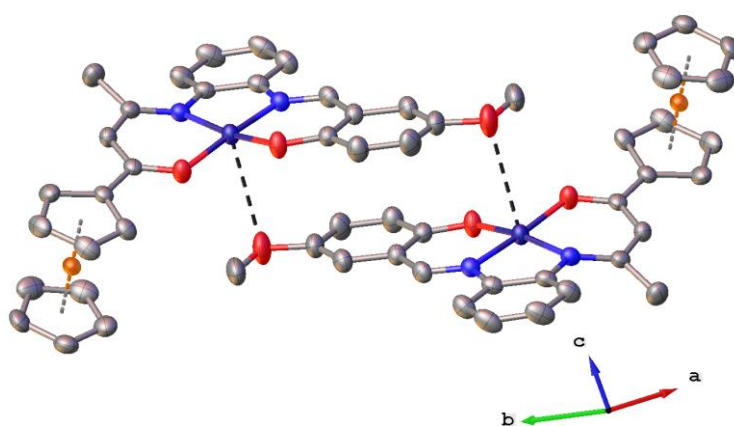

**Fig. S12** Packing diagram of  $7 \cdot \text{CH}_3\text{OH}$  showing the apical interaction (dashed line) between the Cu(II) center and the methoxy oxygen atom of the 5-substituted salicylidene ring of a neighboring molecule. Hydrogen atoms and crystallization solvent molecules have been omitted for clarity.

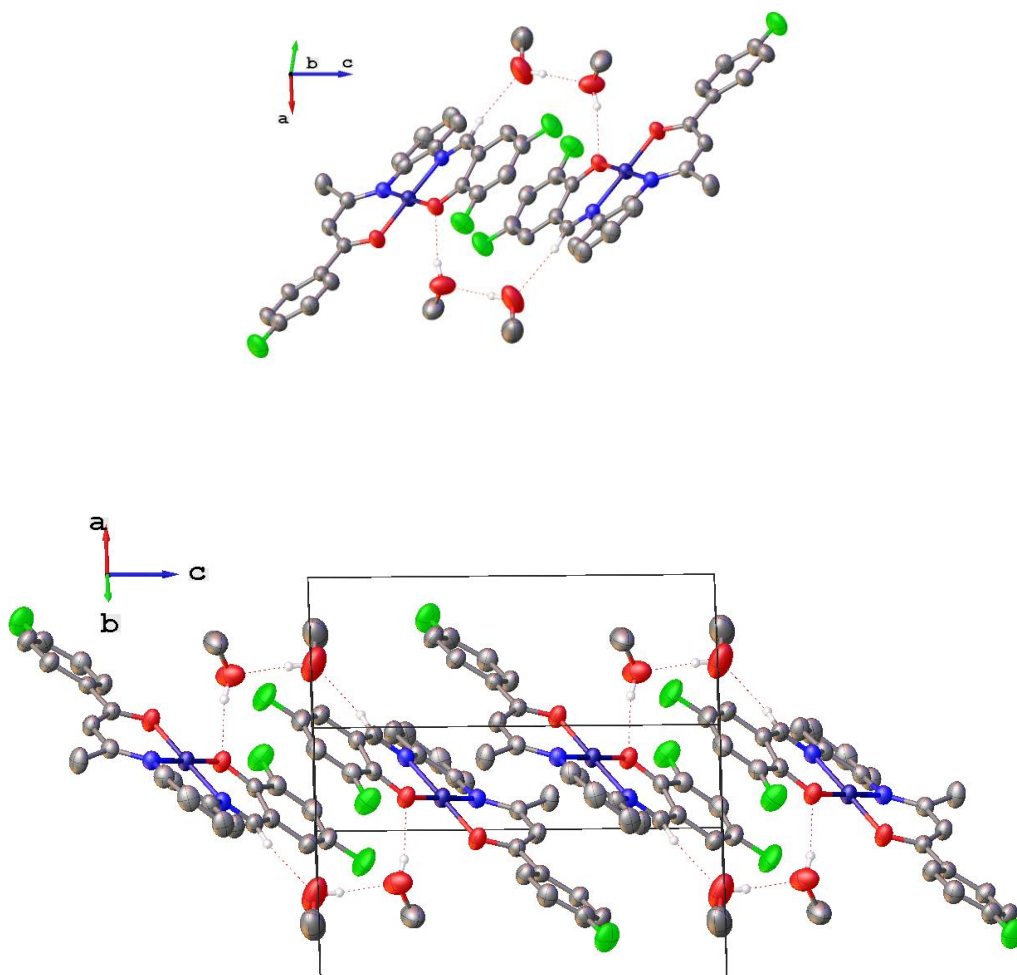

**Fig. S13** Packing diagram of  $9 \cdot 2\text{CH}_3\text{OH}$  showing the hydrogen bonding interactions between one methanol crystallization molecule and the phenolato oxygen of the complex and between the two methanol molecules. All other hydrogen atoms have been omitted for clarity.

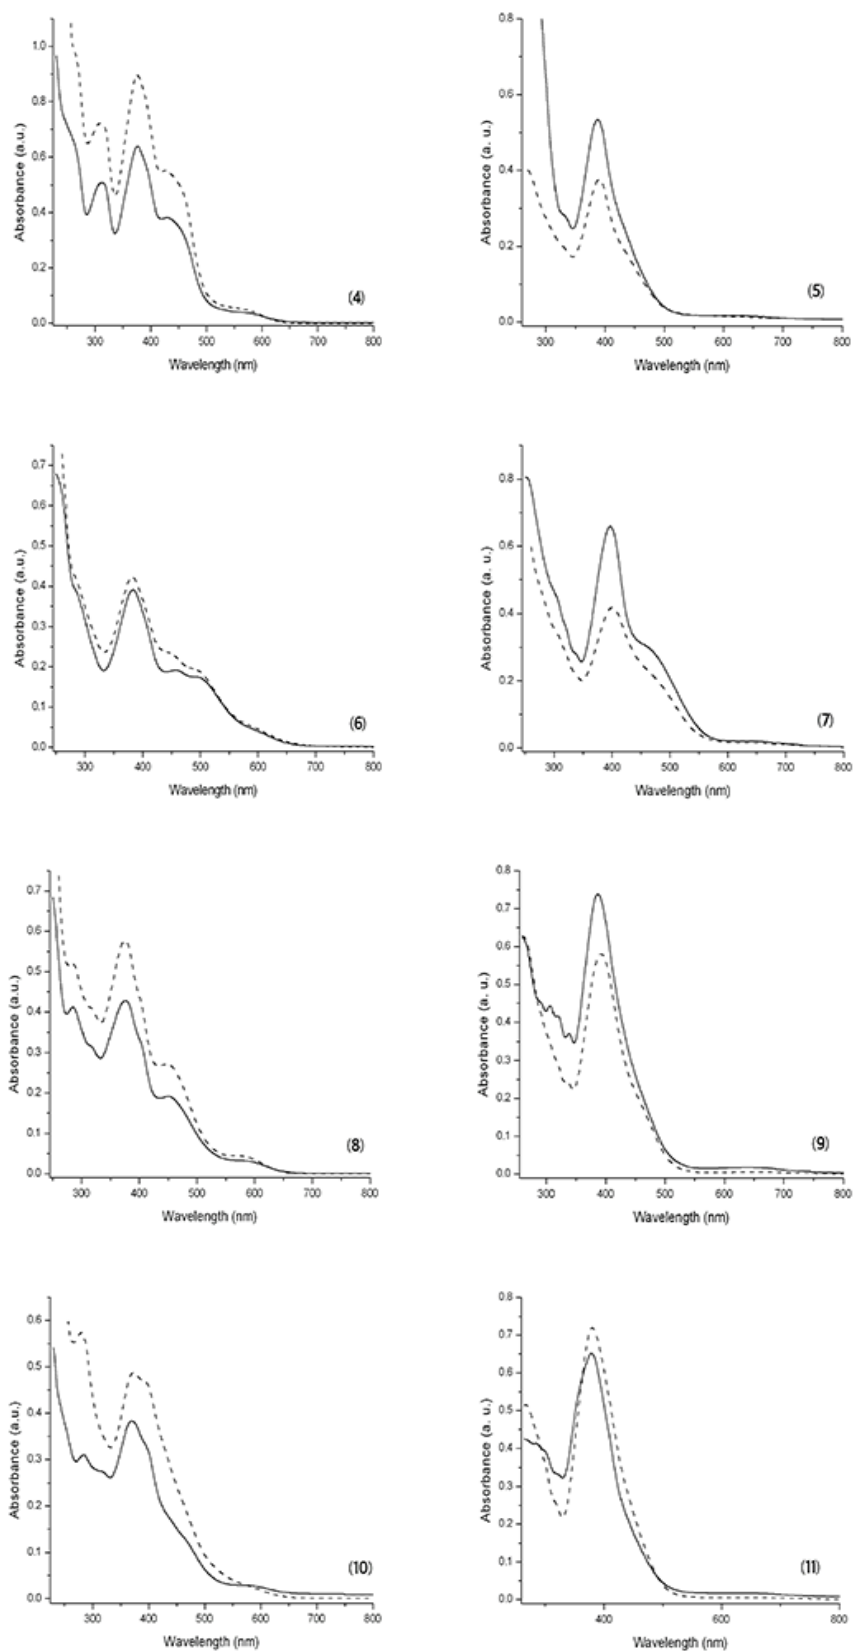

**Fig. S14** Electronic absorption spectra of the Schiff base complexes **4-11** recorded in  $\text{CH}_2\text{Cl}_2$  (solid line) and in DMSO (dashed line)

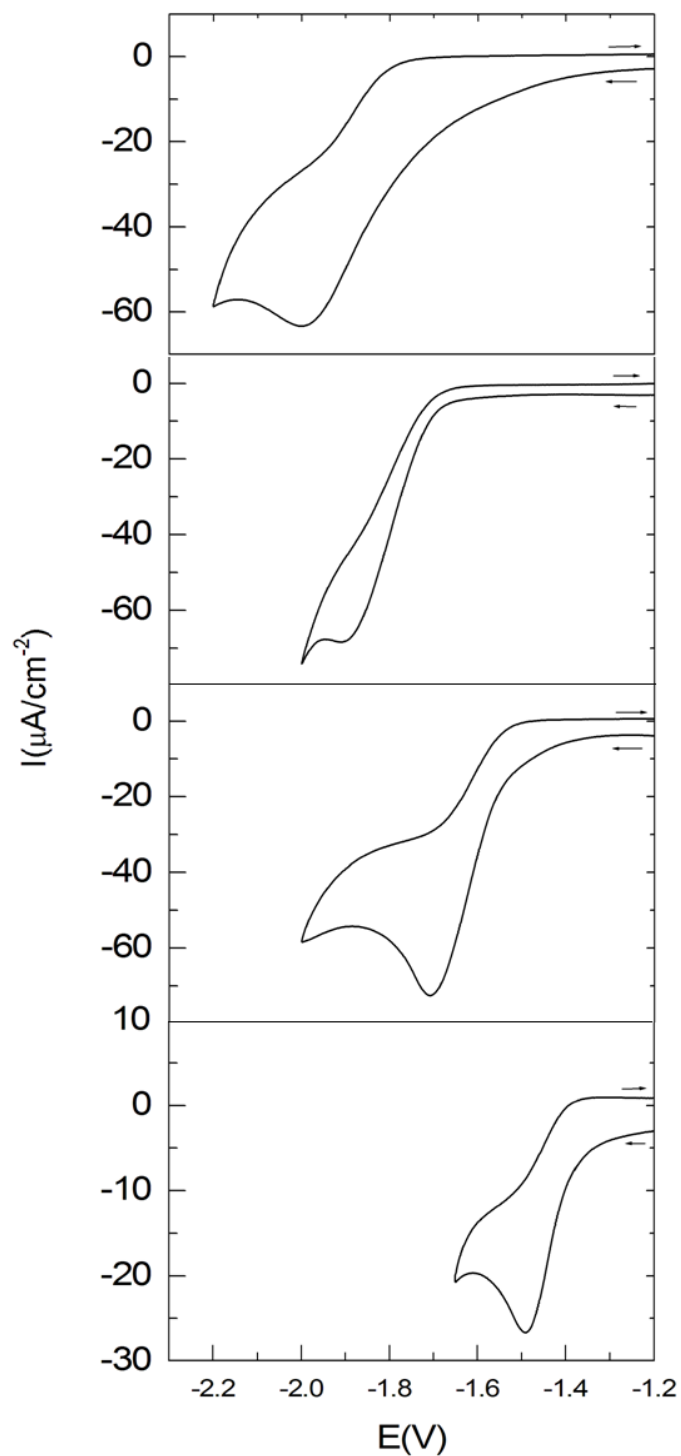

**Fig. S15** Cyclic voltammograms of the Ni(II) Complexes **4**, **6**, **8** and **10** (from top to bottom), recorded in  $\text{CH}_2\text{Cl}_2$  containing 0.1 M  $n\text{-Bu}_4\text{N}^+\text{PF}_6^-$  at 293 K with a vitreous carbon working electrode,  $\nu = 100\text{mV s}^{-1}$ , reference electrode  $\text{Ag}/\text{Ag}^+$ .

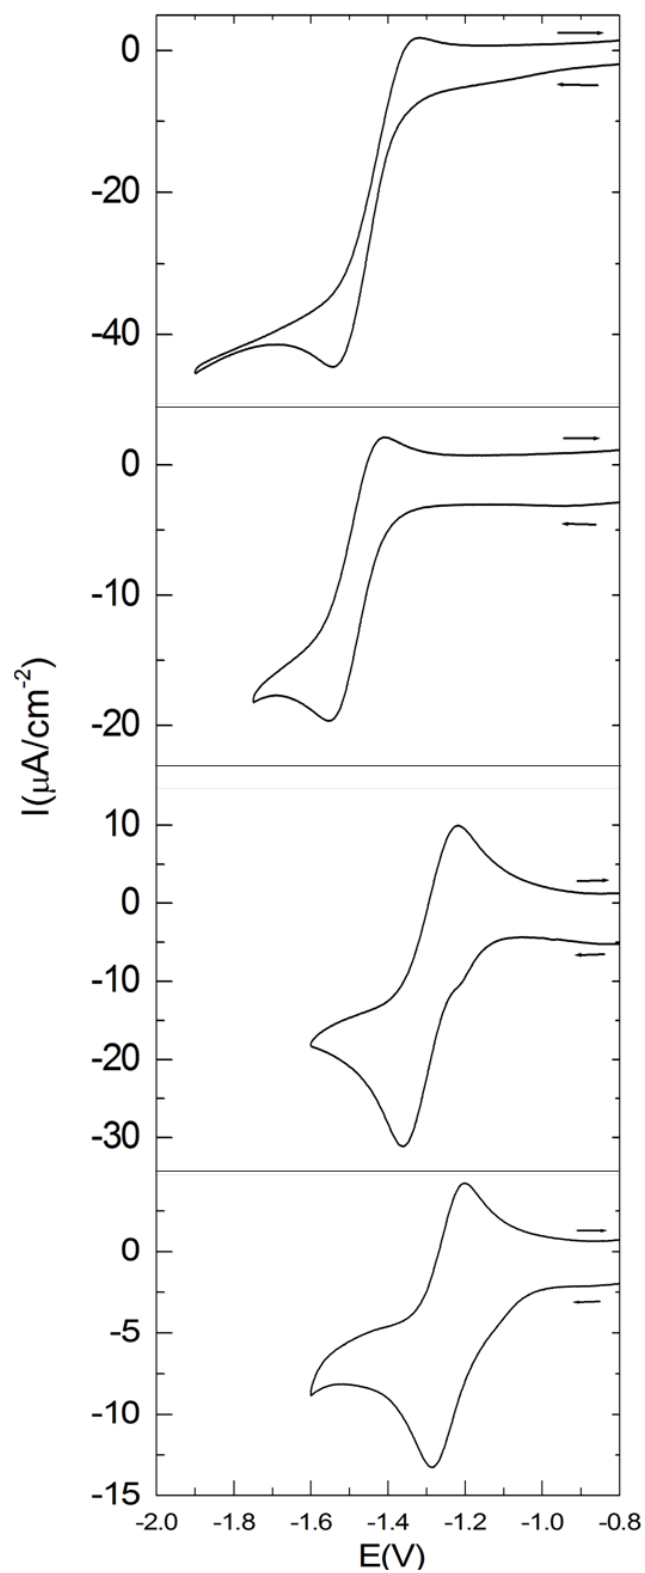

**Fig. S16** Cyclic voltammograms of the Cu(II) Complexes **5**, **7**, **9** and **11** (from top to bottom), recorded in  $\text{CH}_2\text{Cl}_2$  containing 0.1 M  $n\text{-Bu}_4\text{N}^+\text{PF}_6^-$  at 293 K with a vitreous carbon working electrode,  $\nu = 100\text{mV s}^{-1}$ , reference electrode  $\text{Ag}/\text{Ag}^+$ .

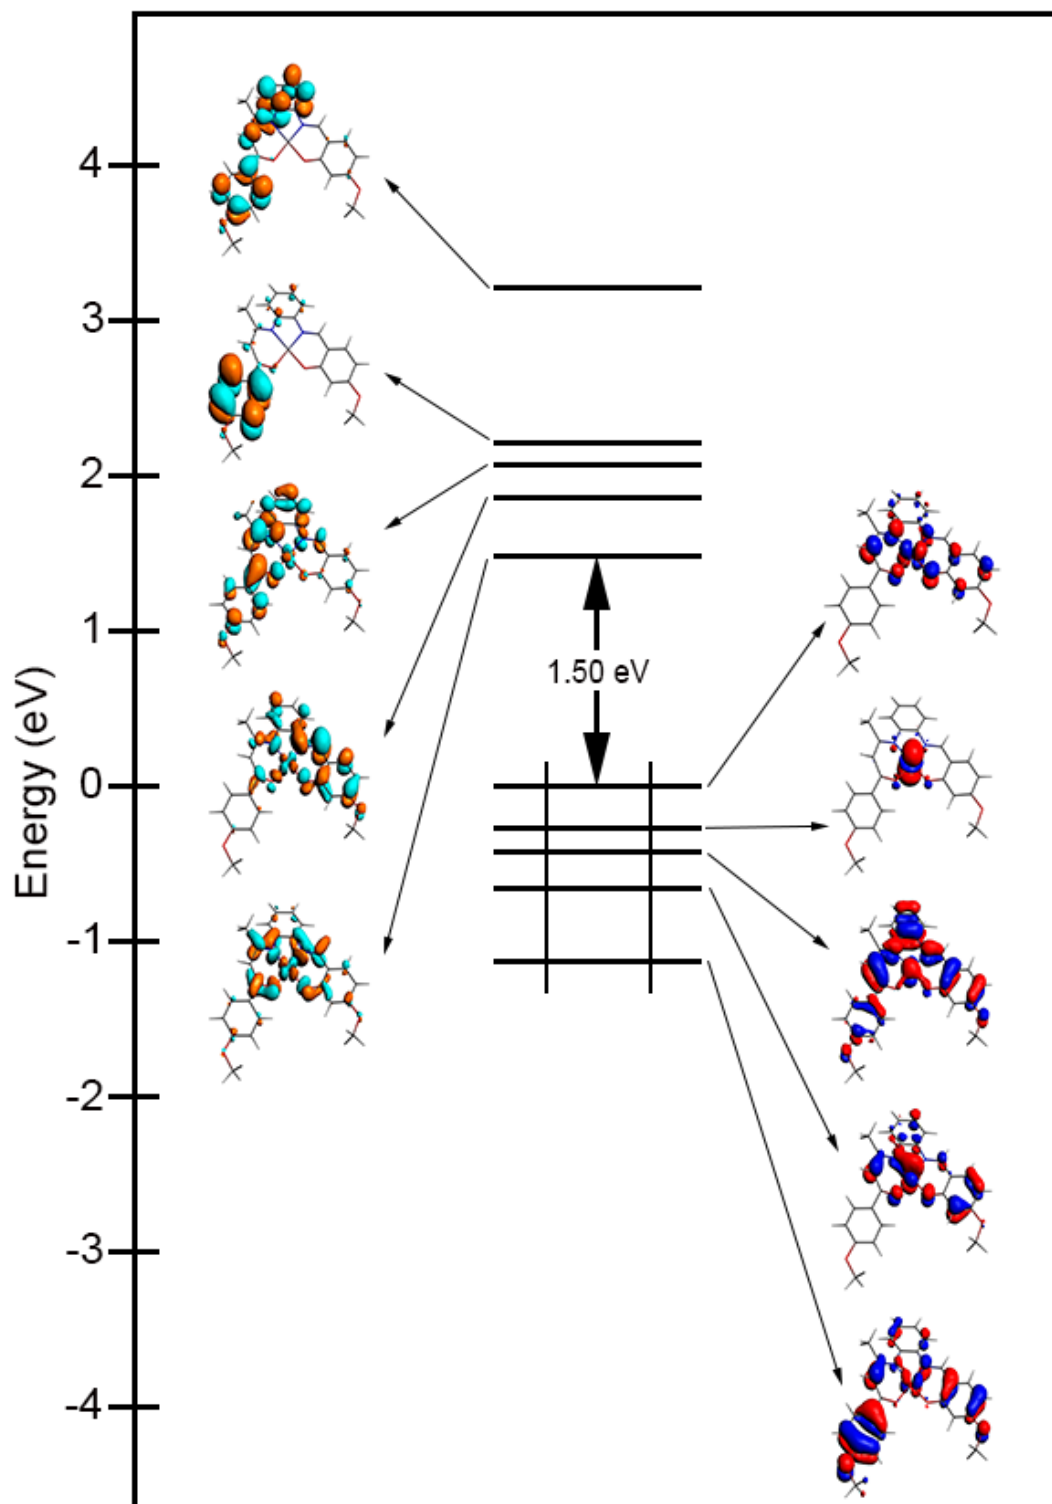

**Fig. S17** MO diagram of compound **4**. The HOMO energy has been arbitrarily set to zero.

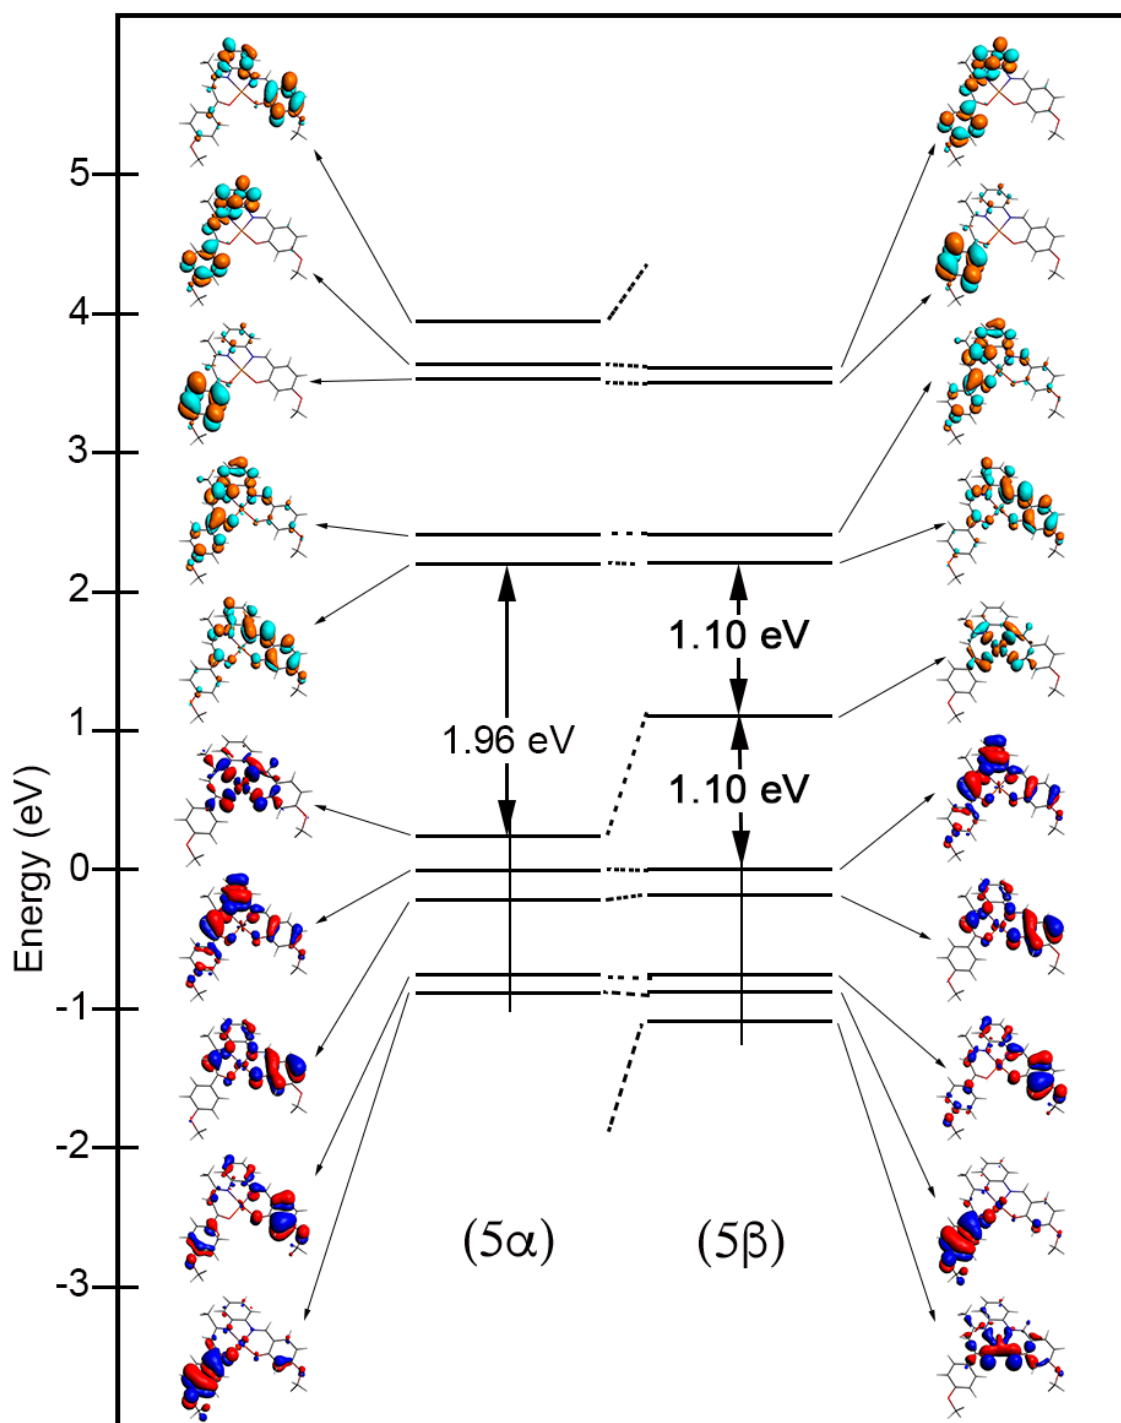

**Fig. S18** MO diagram of compound **5**. The HOMO energy has been arbitrarily set to zero.



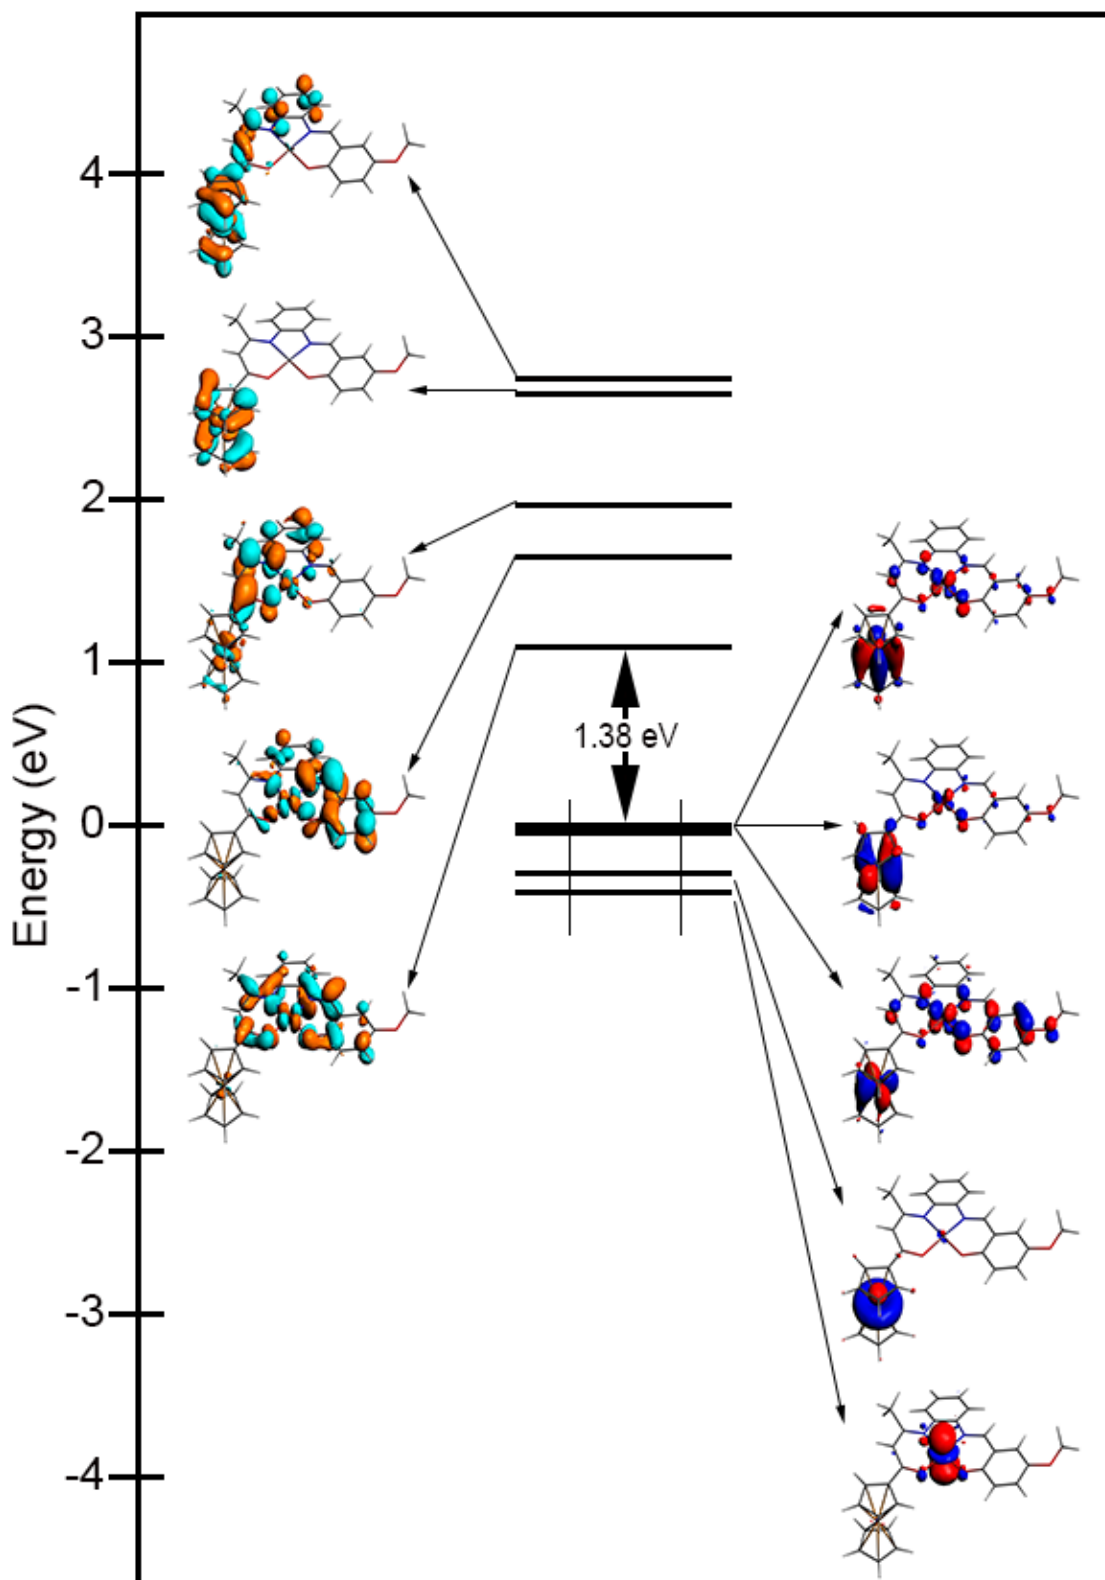

**Fig. S91** MO diagram of compound **6**. The HOMO energy has been arbitrarily set to zero.

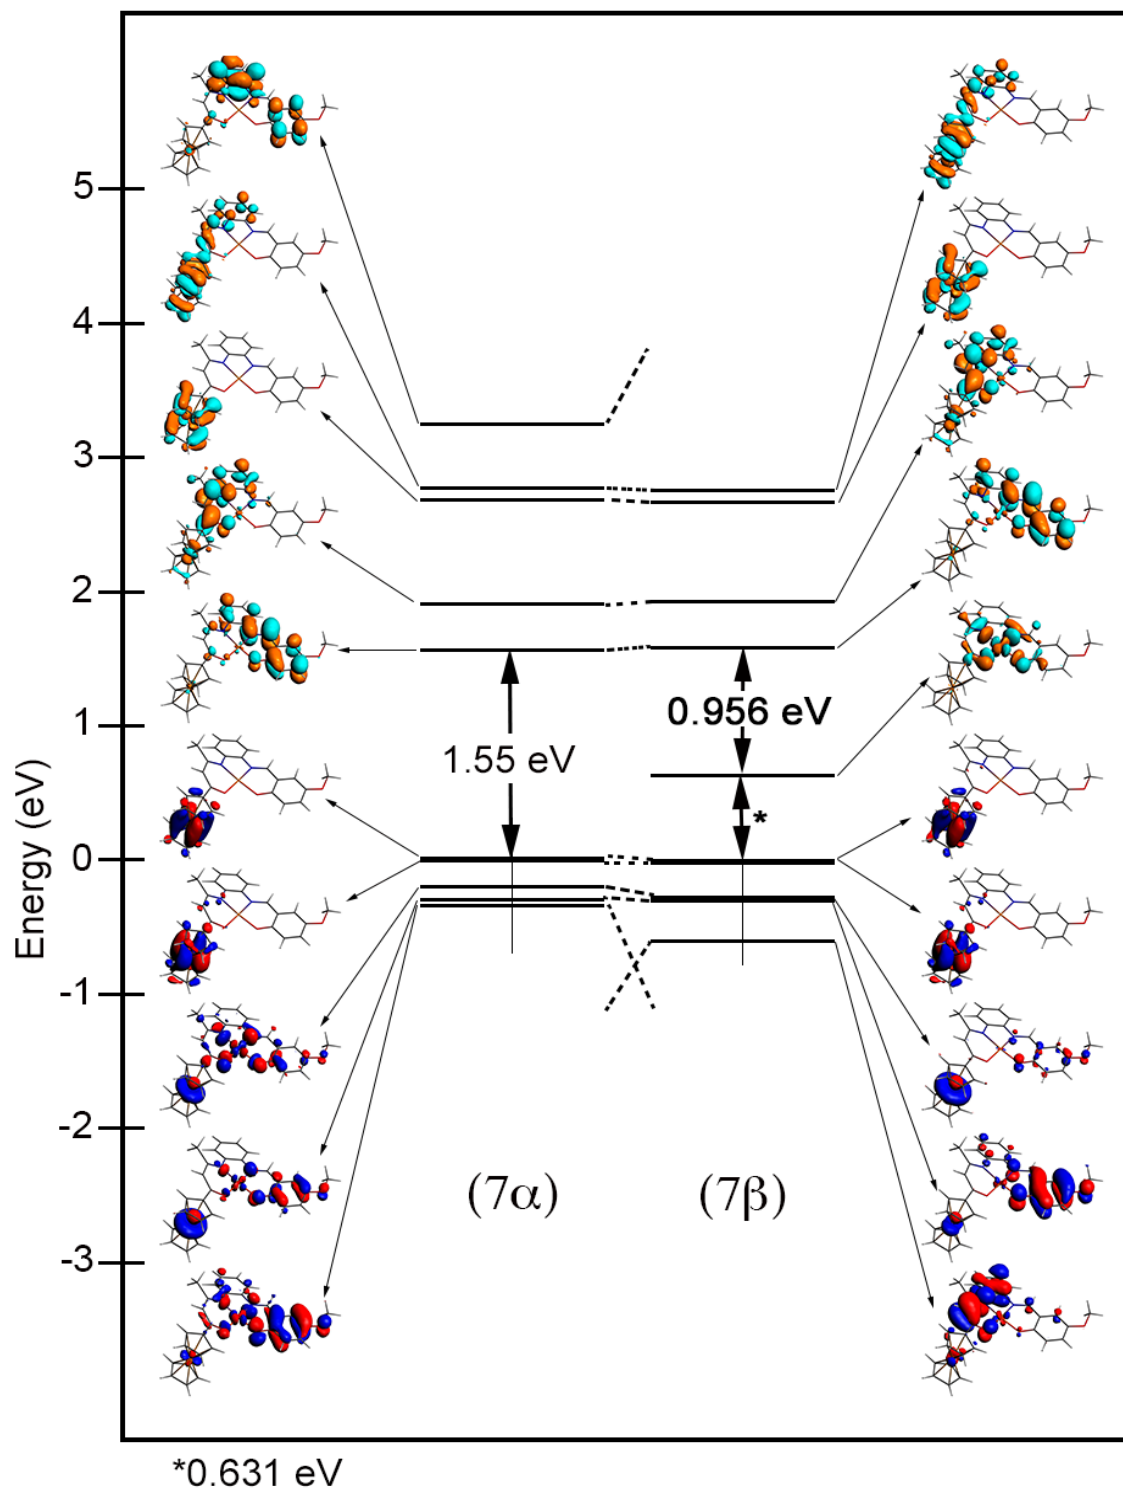

**Fig. S20** MO diagram of compound **7**. The HOMO energy has been arbitrarily set to zero.

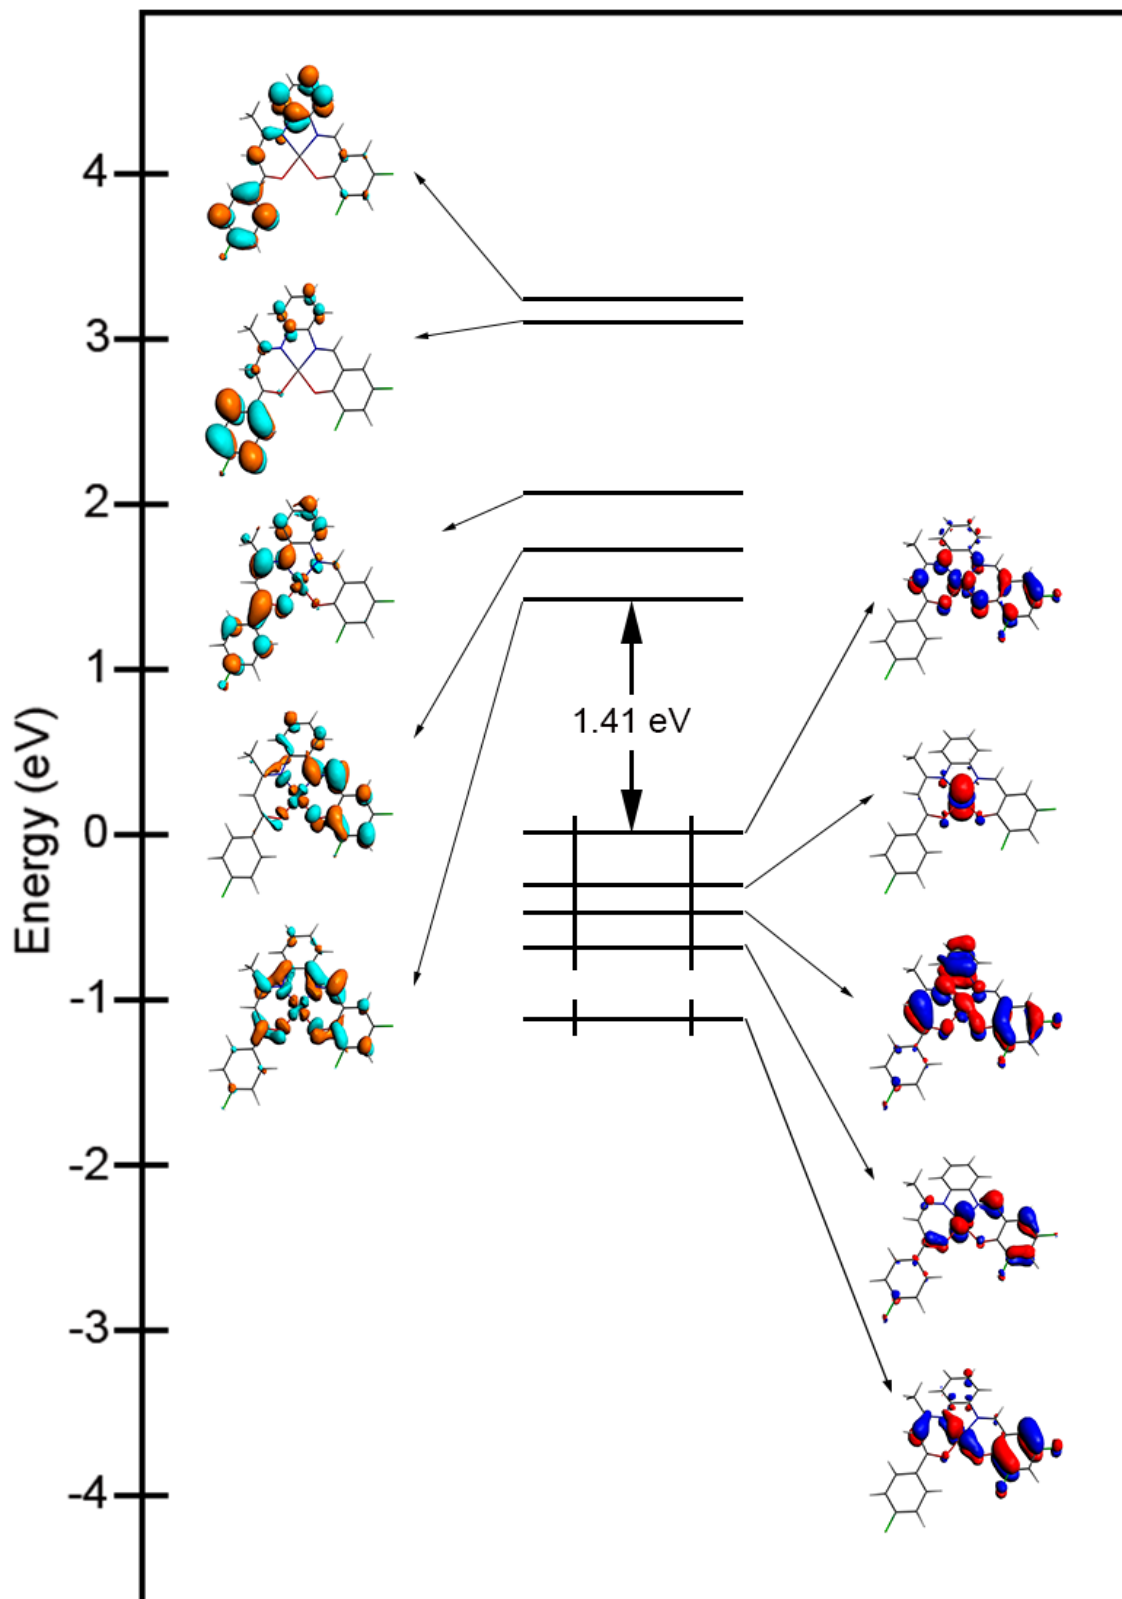

**Fig. S21** MO diagram of compound **8**. The HOMO energy has been arbitrarily set to zero.

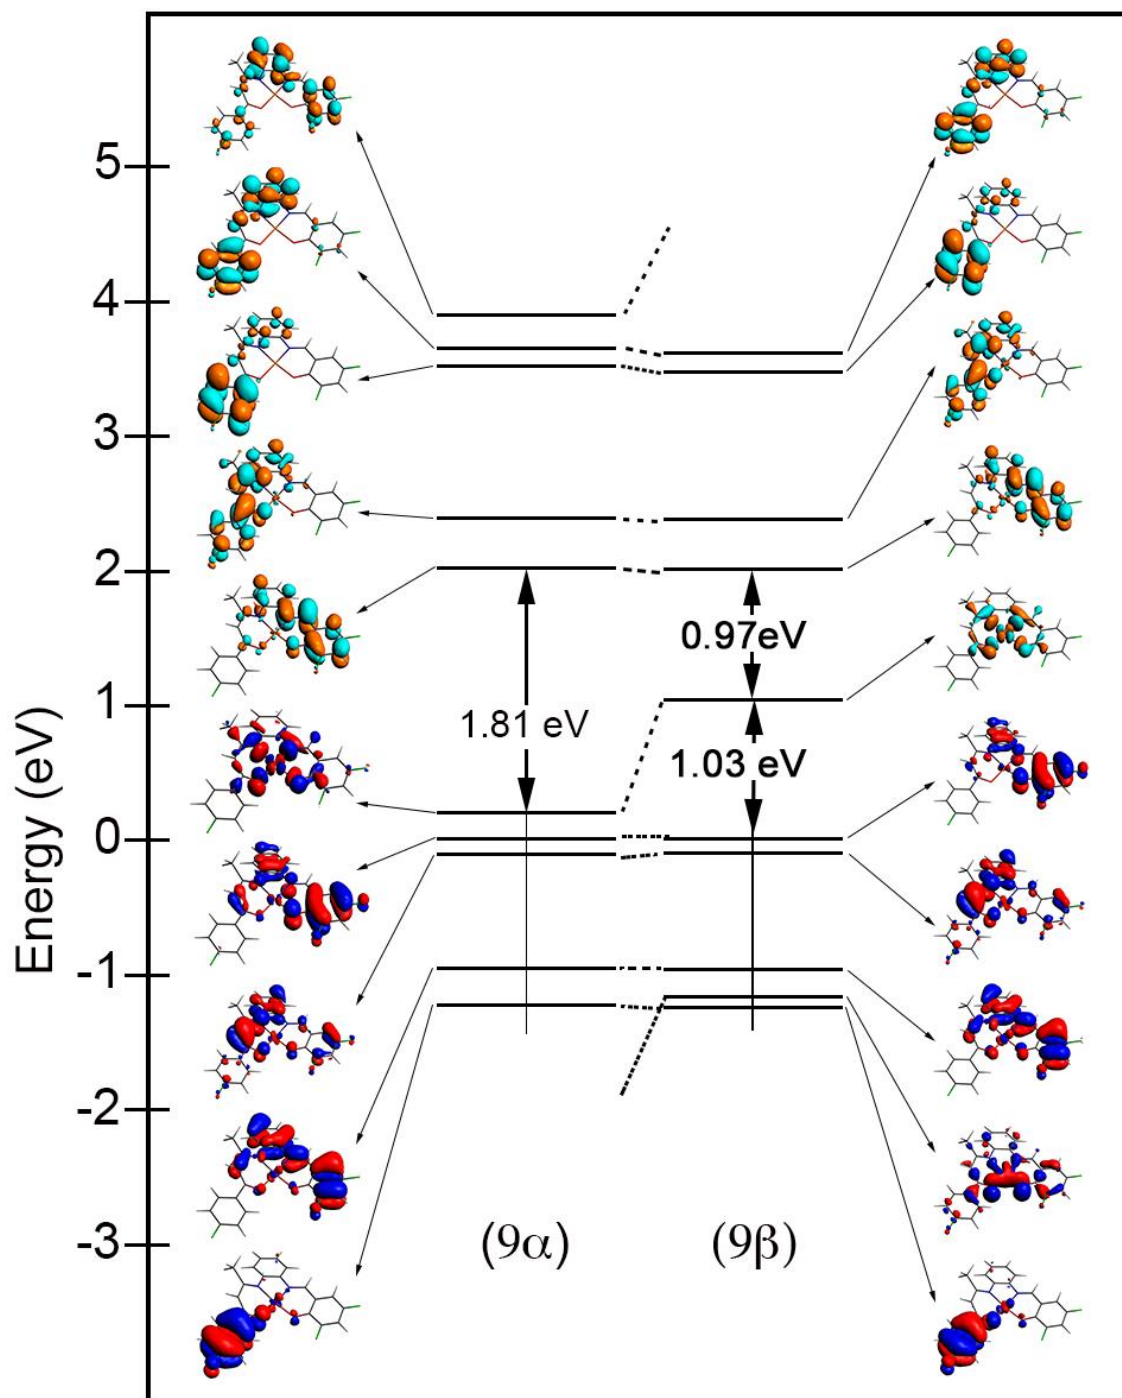

Fig. S22 MO diagram of compound **9**. The HOMO energy has been arbitrarily set to zero.

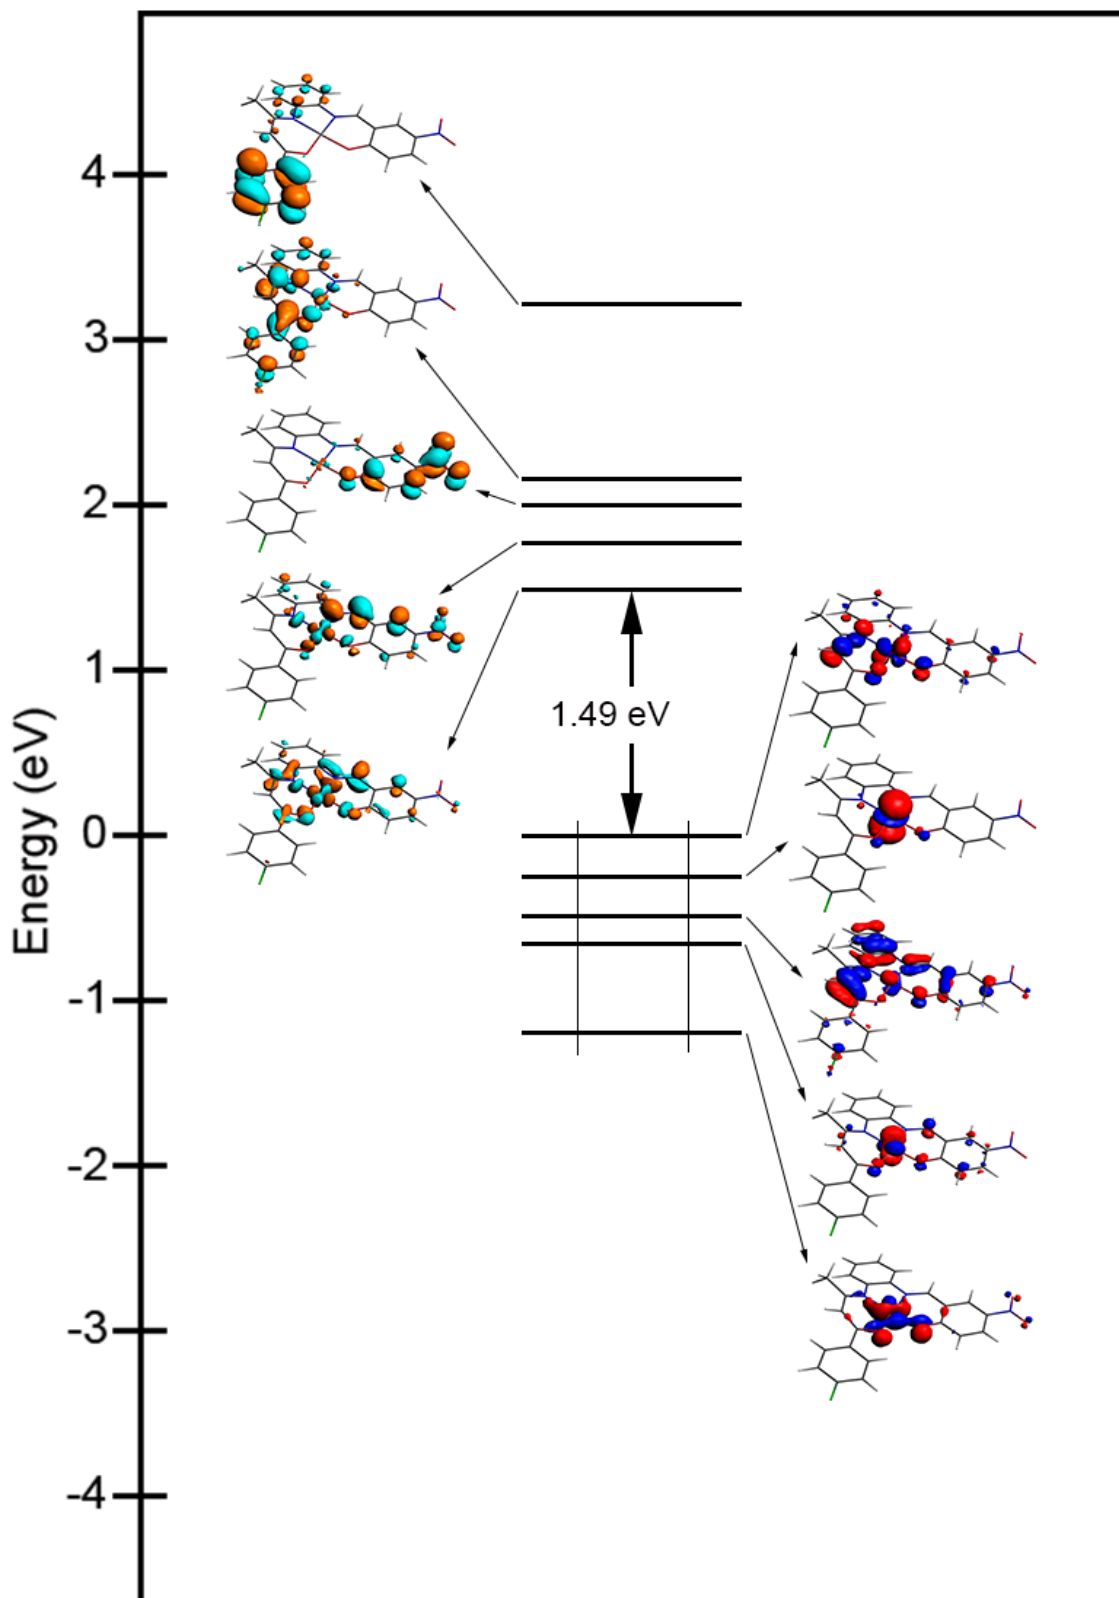

Fig. S23 MO diagram of compound **10**. The HOMO energy has been arbitrarily set to zero.

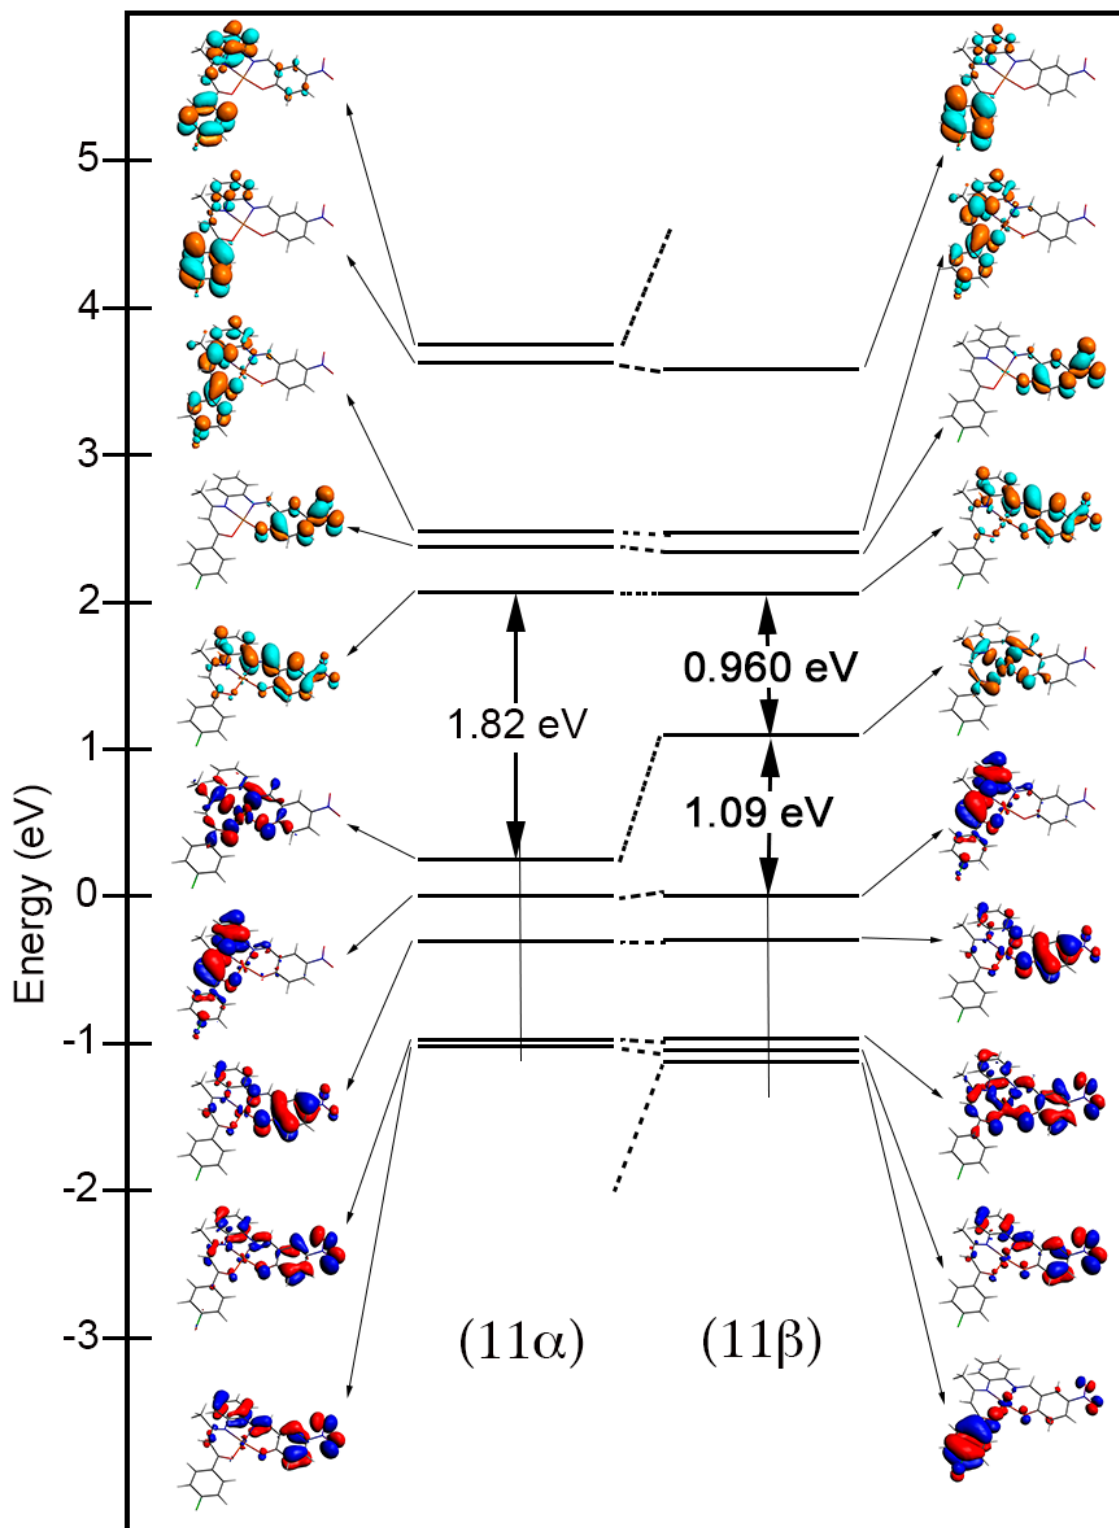

**Fig. S24** MO diagram of compound **11**. The HOMO energy has been arbitrarily set to zero.

**Table S1.** Selected bond distances (Å) and angles (°) for compounds **4**·H<sub>2</sub>O and **5**·CH<sub>2</sub>Cl<sub>2</sub> with their theoretically computed values into brackets

|                   | 4·H <sub>2</sub> O | 5·CH <sub>2</sub> Cl <sub>2</sub> |
|-------------------|--------------------|-----------------------------------|
| Bond distances    |                    |                                   |
| O(1)-C(8)         | 1.286(5) [1.286]   | 1.288(4) [1.285]                  |
| O(2)-C(20)        | 1.306(5) [1.297]   | 1.299(4) [1.295]                  |
| O(3)-C(1)         | 1.418(6) [1.429]   | 1.410(5) [1.429]                  |
| O(3)-C(2)         | 1.370(5) [1.367]   | 1.367(4) [1.367]                  |
| O(4)-C(22)        | 1.368(6) [1.365]   | 1.367(4) [1.365]                  |
| O(4)-C(25)        | 1.416(7) [1.430]   | 1.414(5) [1.430]                  |
| N(1)-C(10)        | 1.330(6) [1.345]   | 1.320(5) [1.339]                  |
| N(1)-C(12)        | 1.415(6) [1.405]   | 1.410(5) [1.397]                  |
| N(2)-C(17)        | 1.417(6) [1.409]   | 1.408(4) [1.403]                  |
| N(2)-C(18)        | 1.299(6) [1.319]   | 1.297(4) [1.314]                  |
| C(8)-C(9)         | 1.380(6) [1.405]   | 1.386(5) [1.410]                  |
| C(9)-C(10)        | 1.392(6) [1.401]   | 1.398(5) [1.406]                  |
| C(12)-C(17)       | 1.386(7) [1.417]   | 1.408(5) [1.428]                  |
| C(18)-C(19)       | 1.419(6) [1.408]   | 1.411(5) [1.414]                  |
| C(19)-C(20)       | 1.413(6) [1.441]   | 1.422(5) [1.450]                  |
| Angles            |                    |                                   |
| M(1)-O(1)-C(8)    | 125.5(3) [126]     | 123.5(2) [124]                    |
| M(1)-O(2)-C(20)   | 127.6(3) [127]     | 126.6(2) [126]                    |
| M(1)-N(1)-C(10)   | 122.6(3) [123]     | 121.6(2) [121]                    |
| M(1)-N(1)-C(12)   | 112.0(3) [112]     | 111.8(2) [111]                    |
| M(1)-N(2)-C(17)   | 112.9(3) [113]     | 112.9(2) [112]                    |
| M(1)-N(2)-C(18)   | 125.1(3) [125]     | 124.8(2) [124]                    |
| O(1)-C(8)-C(9)    | 123.6(4) [124]     | 124.6(3) [125]                    |
| C(8)-C(9)-C(10)   | 125.8(4) [126]     | 127.9(3) [128]                    |
| C(9)-C(10)-N(1)   | 122.2(4) [123]     | 121.4(3) [123]                    |
| O(2)-C(20)-C(19)  | 123.4(4) [124]     | 124.2(3) [125]                    |
| N(2)-C(18)-C(19)  | 125.9(4) [126]     | 126.3(3) [127]                    |
| C(18)-C(19)-C(20) | 121.9(4) [122]     | 123.5(3) [124]                    |

M = Ni, **4**; Cu, **5**.

**Table S2.** Selected bond distances (Å) and angles (°) for compound **7**·CH<sub>3</sub>OH with its theoretically computed values into brackets

| Bond distances    |                  |                   |                  |
|-------------------|------------------|-------------------|------------------|
| O(1)-C(11)        | 1.284(3) [1.283] | O(2)-C(23)        | 1.316(3) [1.295] |
| N(1)-C(13)        | 1.333(3) [1.328] | N(1)-C(15)        | 1.415(3) [1.408] |
| N(2)-C(20)        | 1.419(3) [1.289] | N(2)-C(21)        | 1.291(3) [1.421] |
| O(3)-C(27)        | 1.384(3) [1.400] | O(3)-C(28)        | 1.413(4) [1.320] |
| C(10)-C(11)       | 1.476(3) [1.540] | C(11)-C(12)       | 1.388(3) [1.370] |
| C(12)-C(13)       | 1.404(3) [1.408] | C(15)-C(20)       | 1.411(3) [1.408] |
| C(21)-C(22)       | 1.426(3) [1.421] | C(22)-C(23)       | 1.414(3) [1.423] |
| Fe(1)-C(Cp) avg   | 2.037(3)         | Fe(1)-C(Cp') avg  | 2.039(2)         |
| Angles            |                  |                   |                  |
| Cu(1)-O(1)-C(11)  | 124.78(15) [125] | Cu(1)-O(2)-C(23)  | 126.53(15) [126] |
| Cu(1)-N(1)-C(13)  | 121.55(16) [122] | Cu(1)-N(1)-C(15)  | 111.43(14) [112] |
| Cu(1)-N(2)-C(20)  | 112.55(14) [125] | Cu(1)-N(2)-C(21)  | 125.24(16) [125] |
| O(1)-C(11)-C(12)  | 124.6(2) [125]   | O(2)-C(23)-C(22)  | 124.2(2) [126]   |
| N(1)-C(13)-C(12)  | 122.1(2) [121]   | N(2)-C(21)-C(22)  | 126.2(2) [126]   |
| C(11)-C(12)-C(13) | 127.7(2) [128]   | C(21)-C(22)-C(23) | 123.3(2) [122]   |

Abbreviations: Cp = C<sub>5</sub>H<sub>5</sub>, Cp' = C<sub>5</sub>H<sub>4</sub>

**Table S3.** Selected bond distances (Å) and angles (°) for compounds **9**·2CH<sub>3</sub>OH and **11** with their theoretically computed values into brackets

|  | 9·2CH <sub>3</sub> OH | 11 |
|--|-----------------------|----|
|--|-----------------------|----|

| Bond distances    |                    |                  |
|-------------------|--------------------|------------------|
| O(1)-C(7)         | 1.2861(19) [1.283] | 1.284(3) [1.285] |
| O(2)-C(19)        | 1.3074(19) [1.292] | 1.295(3) [1.289] |
| N(1)-C(9)         | 1.325(2) [1.339]   | 1.331(4) [1.339] |
| N(1)-C(11)        | 1.4157(19) [1.396] | 1.413(4) [1.397] |
| N(2)-C(16)        | 1.419(2) [1.405]   | 1.416(4) [1.407] |
| N(2)-C(17)        | 1.293(2) [1.310]   | 1.290(4) [1.306] |
| C(7)-C(8)         | 1.386(2) [1.409]   | 1.400(4) [1.408] |
| C(8)-C(9)         | 1.416(2) [1.406]   | 1.414(4) [1.406] |
| C(11)-C(16)       | 1.406(2) [1.427]   | 1.405(4) [1.426] |
| C(17)-C(18)       | 1.432(2) [1.423]   | 1.433(4) [1.427] |
| C(18)-C(19)       | 1.419(2) [1.444]   | 1.437(4) [1.453] |
| F(1)-C(1)         | 1.354(2) [1.360]   | 1.363(4) [1.359] |
| F(2)-C(20)        | 1.351(2) [1.352]   | -                |
| F(3)-C(22)        | 1.367(2) [1.364]   | -                |
| N(3)-C(22)        | -                  | 1.467(4) [1.459] |
| N(3)-O(3)         | -                  | 1.220(5) [1.242] |
| N(3)-O(4)         | -                  | 1.214(4) [1.241] |
| Angles            |                    |                  |
| Cu(1)-O(1)-C(7)   | 124.15(10) [124]   | 124.53(19) [124] |
| Cu(1)-O(2)-C(19)  | 126.08(10) [126]   | 126.84(18) [127] |
| Cu(1)-N(1)-C(9)   | 122.52(10) [121]   | 122.8(2) [121]   |
| Cu(1)-N(1)-C(11)  | 111.21(10) [111]   | 110.68(17) [111] |
| Cu(1)-N(2)-C(16)  | 111.87(10) [112]   | 111.0(2) [112]   |
| Cu(1)-N(2)-C(17)  | 126.01(11) [125]   | 125.5(2) [124]   |
| O(1)-C(7)-C(8)    | 124.68(14) [125]   | 125.1(3) [125]   |
| C(7)-C(8)-C(9)    | 127.26(15) [128]   | 127.1(3) [128]   |
| C(8)-C(9)-N(1)    | 121.76(14) [123]   | 122.0(3) [123]   |
| O(2)-C(19)-C(18)  | 125.51(14) [126]   | 124.0(3) [125]   |
| N(2)-C(17)-C(18)  | 125.21(14) [127]   | 125.7(3) [126]   |
| C(17)-C(18)-C(19) | 122.74(14) [123]   | 123.0(3) [124]   |

**Table S4.** Hydrogen Bonding interaction parameters for compounds **4**·H<sub>2</sub>O, **5**·CH<sub>2</sub>Cl<sub>2</sub>, **7**·CH<sub>3</sub>OH and **9**·2CH<sub>3</sub>OH

| Compd                                     | D-H···A                           | D-H (Å) | H···A (Å) | D···A (Å)  | D-H···A (°) |
|-------------------------------------------|-----------------------------------|---------|-----------|------------|-------------|
| <b>4</b> ·H <sub>2</sub> O                | O(5)-H(5B)···O(2)                 | 0.80    | 2.15      | 2.880(6)   | 152.4       |
|                                           | O(5)-H(5A)···O(3)                 | 0.80    | 2.11      | 2.943(8)   | 165.4       |
| <b>5</b> ·CH <sub>2</sub> Cl <sub>2</sub> | C(26)-H(26A)···O(2)               | 0.97    | 2.32      | 3.289(5)   | 174.8       |
|                                           | C(26)-H(26A)···O(3) <sup>#1</sup> | 0.97    | 2.61      | 3.401(6)   | 139.0       |
| <b>7</b> ·CH <sub>3</sub> OH              | O(4)-H(4A)···O(2) <sup>#2</sup>   | 0.82    | 1.97      | 2.789(3)   | 172.6       |
| <b>9</b> ·2CH <sub>3</sub> OH             | O(3)-H(3)···O(2)                  | 0.82    | 2.04      | 2.8424(18) | 168.0       |
|                                           | O(4)-H(4A)···O(3)                 | 0.82    | 1.93      | 2.745(3)   | 176.1       |

Symmetry transformations: #1 2-X,2-Y,2-Z; #2 1-X,-Y,-Z.

**Table S5.** Computed bond distances (Å) and angles (°) of the [Ni(N<sub>2</sub>O<sub>2</sub>)] coordination core for compounds **6**, **8** and **10**



|                 | <b>6</b> | <b>8</b> | <b>10</b> |
|-----------------|----------|----------|-----------|
| Bond distances  |          |          |           |
| Ni(1)-O(1)      | 1.877    | 1.874    | 1.873     |
| Ni(1)-O(2)      | 1.875    | 1.878    | 1.882     |
| Ni(1)-N(1)      | 1.905    | 1.898    | 1.897     |
| Ni(1)-N(2)      | 1.869    | 1.870    | 1.871     |
| Angles          |          |          |           |
| O(1)-Ni(1)-N(2) | 178      | 177      | 178       |
| O(2)-Ni(1)-N(1) | 178      | 177      | 177       |
| O(1)-Ni(1)-O(2) | 83       | 83       | 84        |
| O(1)-Ni(1)-N(1) | 96       | 96       | 96        |
| O(2)-Ni(1)-N(2) | 95       | 95       | 95        |
| N(1)-Ni(1)-N(2) | 86       | 86       | 86        |

**Table S6.** Computed bond distances (Å) and angles (°) for compound **6**

| Bond distances              |       |                              |       |
|-----------------------------|-------|------------------------------|-------|
| O(1)-C(11)                  | 1.286 | O(2)-C(23)                   | 1.299 |
| N(1)-C(13)                  | 1.348 | N(1)-C(15)                   | 1.404 |
| N(2)-C(20)                  | 1.409 | N(2)-C(21)                   | 1.320 |
| O(3)-C(27)                  | 1.377 | O(3)-C(28)                   | 1.423 |
| C(10)-C(11)                 | 1.471 | C(11)-C(12)                  | 1.408 |
| C(12)-C(13)                 | 1.398 | C(15)-C(20)                  | 1.418 |
| C(21)-C(22)                 | 1.411 | C(22)-C(23)                  | 1.435 |
| Fe(1)-Cp <sub>CNT</sub> avg | 1.688 | Fe(1)-Cp' <sub>CNT</sub> avg | 1.679 |
| Angles                      |       |                              |       |
| Ni(1)-O(1)-C(11)            | 125   | Ni(1)-O(2)-C(23)             | 127   |
| Ni(1)-N(1)-C(13)            | 112   | Ni(1)-N(1)-C(15)             | 112   |
| Ni(1)-N(2)-C(20)            | 113   | Ni(1)-N(2)-C(21)             | 125   |
| O(1)-C(11)-C(12)            | 124   | O(2)-C(23)-C(22)             | 124   |
| N(1)-C(13)-C(12)            | 122   | N(2)-C(21)-C(22)             | 126   |
| C(11)-C(12)-C(13)           | 126   | C(21)-C(22)-C(23)            | 121   |

Abbreviations: Cp = C<sub>5</sub>H<sub>5</sub>, Cp' = C<sub>5</sub>H<sub>4</sub>

**Table S7.** Computed bond distances (Å) and angles (°) for compounds **8** and **10**

|                | <b>8</b> | <b>10</b> |
|----------------|----------|-----------|
| Bond distances |          |           |

|                   |       |       |
|-------------------|-------|-------|
| O(1)-C(7)         | 1.284 | 1.286 |
| O(2)-C(19)        | 1.294 | 1.291 |
| N(1)-C(9)         | 1.345 | 1.345 |
| N(1)-C(11)        | 1.404 | 1.405 |
| N(2)-C(16)        | 1.411 | 1.414 |
| N(2)-C(17)        | 1.316 | 1.312 |
| C(7)-C(8)         | 1.404 | 1.404 |
| C(8)-C(9)         | 1.401 | 1.401 |
| C(11)-C(16)       | 1.416 | 1.415 |
| C(17)-C(18)       | 1.415 | 1.420 |
| C(18)-C(19)       | 1.436 | 1.444 |
| F(1)-C(1)         | 1.359 | 1.359 |
| F(2)-C(20)        | 1.352 | -     |
| F(3)-C(22)        | 1.364 | -     |
| N(3)-C(22)        | -     | 1.459 |
| N(3)-O(3)         | -     | 1.242 |
| N(3)-O(4)         | -     | 1.241 |
| Angles            |       |       |
| Ni(1)-O(1)-C(7)   | 126   | 125   |
| Ni(1)-O(2)-C(19)  | 126   | 127   |
| Ni(1)-N(1)-C(9)   | 123   | 123   |
| Ni(1)-N(1)-C(11)  | 111   | 111   |
| Ni(1)-N(2)-C(16)  | 113   | 113   |
| Ni(1)-N(2)-C(17)  | 125   | 125   |
| O(1)-C(7)-C(8)    | 124   | 124   |
| C(7)-C(8)-C(9)    | 126   | 126   |
| C(8)-C(9)-N(1)    | 122   | 122   |
| O(2)-C(19)-C(18)  | 125   | 124   |
| N(2)-C(17)-C(18)  | 126   | 126   |
| C(17)-C(18)-C(19) | 121   | 122   |

**Table S8.** Computed geometry optimization parameters of compound **4**

| ATOMS | X          | Y | Z | CHARGE |       |         |
|-------|------------|---|---|--------|-------|---------|
|       |            |   |   | Nucl   | +Core | At.Mass |
|       | (Angstrom) |   |   |        |       |         |

|    |    |         |         |         |       |       |         |
|----|----|---------|---------|---------|-------|-------|---------|
| 1  | Ni | -0.0805 | 0.0927  | -0.0807 | 28.00 | 10.00 | 57.9353 |
| 2  | N  | -0.2163 | 1.9856  | -0.0064 | 7.00  | 5.00  | 14.0031 |
| 3  | O  | 0.0834  | -1.7736 | -0.2484 | 8.00  | 6.00  | 15.9949 |
| 4  | H  | 1.3205  | 4.5583  | -1.4715 | 1.00  | 1.00  | 1.0078  |
| 5  | O  | 1.7948  | 0.0413  | -0.0690 | 8.00  | 6.00  | 15.9949 |
| 6  | H  | -0.4308 | 4.4156  | -1.1782 | 1.00  | 1.00  | 1.0078  |
| 7  | N  | -1.9504 | 0.0941  | -0.0394 | 7.00  | 5.00  | 14.0031 |
| 8  | C  | 2.5710  | 1.0437  | -0.2853 | 6.00  | 4.00  | 12.0000 |
| 9  | C  | -2.4869 | 1.3620  | 0.2590  | 6.00  | 4.00  | 12.0000 |
| 10 | C  | -3.2323 | -3.3146 | -0.6566 | 6.00  | 4.00  | 12.0000 |
| 11 | H  | -4.2870 | -3.0385 | -0.6889 | 1.00  | 1.00  | 1.0078  |
| 12 | C  | -2.8709 | -4.6276 | -0.8094 | 6.00  | 4.00  | 12.0000 |
| 13 | C  | -2.7126 | -0.9625 | -0.2473 | 6.00  | 4.00  | 12.0000 |
| 14 | H  | -3.7959 | -0.8140 | -0.2532 | 1.00  | 1.00  | 1.0078  |
| 15 | C  | -1.5198 | 2.3964  | 0.3176  | 6.00  | 4.00  | 12.0000 |
| 16 | C  | -0.8729 | -2.6346 | -0.4096 | 6.00  | 4.00  | 12.0000 |
| 17 | C  | 5.0242  | 1.7114  | -0.2576 | 6.00  | 4.00  | 12.0000 |
| 18 | H  | 4.7547  | 2.7598  | -0.1454 | 1.00  | 1.00  | 1.0078  |
| 19 | C  | -1.9280 | 3.6659  | 0.7680  | 6.00  | 4.00  | 12.0000 |
| 20 | H  | -1.1986 | 4.4509  | 0.9296  | 1.00  | 1.00  | 1.0078  |
| 21 | C  | -3.8301 | 1.6297  | 0.5495  | 6.00  | 4.00  | 12.0000 |
| 22 | H  | -4.5714 | 0.8341  | 0.5165  | 1.00  | 1.00  | 1.0078  |
| 23 | C  | -2.2702 | -2.2836 | -0.4502 | 6.00  | 4.00  | 12.0000 |
| 24 | C  | 4.0197  | 0.7259  | -0.3242 | 6.00  | 4.00  | 12.0000 |
| 25 | C  | -0.5201 | -4.0057 | -0.5541 | 6.00  | 4.00  | 12.0000 |
| 26 | C  | 0.7891  | 2.7978  | -0.3793 | 6.00  | 4.00  | 12.0000 |
| 27 | H  | 0.6628  | 4.9143  | 0.1291  | 1.00  | 1.00  | 1.0078  |
| 28 | C  | 4.4197  | -0.6153 | -0.4234 | 6.00  | 4.00  | 12.0000 |
| 29 | H  | 3.6487  | -1.3816 | -0.4655 | 1.00  | 1.00  | 1.0078  |
| 30 | C  | -4.2237 | 2.9092  | 0.9340  | 6.00  | 4.00  | 12.0000 |
| 31 | H  | -5.2679 | 3.1049  | 1.1726  | 1.00  | 1.00  | 1.0078  |
| 32 | C  | -1.4920 | -4.9717 | -0.7527 | 6.00  | 4.00  | 12.0000 |
| 33 | H  | 0.1199  | -7.8061 | -0.9903 | 1.00  | 1.00  | 1.0078  |
| 34 | C  | -3.2666 | 3.9196  | 1.0612  | 6.00  | 4.00  | 12.0000 |
| 35 | H  | -3.5574 | 4.9081  | 1.4140  | 1.00  | 1.00  | 1.0078  |
| 36 | C  | 2.1106  | 2.3521  | -0.5097 | 6.00  | 4.00  | 12.0000 |
| 37 | H  | 2.8374  | 3.0936  | -0.8272 | 1.00  | 1.00  | 1.0078  |
| 38 | C  | 5.7653  | -0.9719 | -0.4740 | 6.00  | 4.00  | 12.0000 |
| 39 | H  | 6.0378  | -2.0215 | -0.5595 | 1.00  | 1.00  | 1.0078  |
| 40 | C  | 6.3671  | 1.3719  | -0.3035 | 6.00  | 4.00  | 12.0000 |
| 41 | H  | 7.1441  | 2.1326  | -0.2447 | 1.00  | 1.00  | 1.0078  |
| 42 | C  | 6.7494  | 0.0252  | -0.4172 | 6.00  | 4.00  | 12.0000 |

|    |   |         |         |         |      |      |         |
|----|---|---------|---------|---------|------|------|---------|
| 43 | C | 0.5611  | 4.2536  | -0.7432 | 6.00 | 4.00 | 12.0000 |
| 44 | H | -3.6036 | -5.4158 | -0.9665 | 1.00 | 1.00 | 1.0078  |
| 45 | H | 8.1924  | -2.1621 | 0.2985  | 1.00 | 1.00 | 1.0078  |
| 46 | O | 8.0955  | -0.2101 | -0.4600 | 8.00 | 6.00 | 15.9949 |
| 47 | C | 8.5281  | -1.5676 | -0.5645 | 6.00 | 4.00 | 12.0000 |
| 48 | H | 8.1643  | -2.0330 | -1.4930 | 1.00 | 1.00 | 1.0078  |
| 49 | H | 9.6213  | -1.5317 | -0.5793 | 1.00 | 1.00 | 1.0078  |
| 50 | O | -1.2311 | -6.3024 | -0.9090 | 8.00 | 6.00 | 15.9949 |
| 51 | C | 0.1346  | -6.7210 | -0.8520 | 6.00 | 4.00 | 12.0000 |
| 52 | H | 0.7265  | -6.2541 | -1.6533 | 1.00 | 1.00 | 1.0078  |
| 53 | H | 0.5839  | -6.4782 | 0.1226  | 1.00 | 1.00 | 1.0078  |
| 54 | H | 0.5387  | -4.2469 | -0.5110 | 1.00 | 1.00 | 1.0078  |

**Table S9.** Computed geometry optimization parameters of compound **5**

| ATOMS | X          | Y | Z | CHARGE      |         |
|-------|------------|---|---|-------------|---------|
|       | (Angstrom) |   |   | Nucl + Core | At.Mass |

|    |    |         |         |         |       |       |         |
|----|----|---------|---------|---------|-------|-------|---------|
| 1  | Cu | 0.0000  | 0.0000  | 0.0000  | 29.00 | 11.00 | 62.9296 |
| 2  | N  | -0.1620 | 1.9511  | 0.0000  | 7.00  | 5.00  | 14.0031 |
| 3  | O  | 0.0913  | -1.9050 | -0.1822 | 8.00  | 6.00  | 15.9949 |
| 4  | H  | 1.2017  | 4.3232  | -1.6436 | 1.00  | 1.00  | 1.0078  |
| 5  | O  | 1.9013  | 0.0000  | 0.0000  | 8.00  | 6.00  | 15.9949 |
| 6  | H  | -0.3079 | 4.2245  | -1.2335 | 1.00  | 1.00  | 1.0078  |
| 7  | N  | -1.9372 | 0.0444  | -0.0408 | 7.00  | 5.00  | 14.0031 |
| 8  | C  | 2.6330  | 1.0328  | -0.2118 | 6.00  | 4.00  | 12.0000 |
| 9  | C  | -2.4592 | 1.3426  | 0.2066  | 6.00  | 4.00  | 12.0000 |
| 10 | C  | -3.2849 | -3.2908 | -0.5825 | 6.00  | 4.00  | 12.0000 |
| 11 | H  | -4.1773 | -3.0338 | -0.6441 | 1.00  | 1.00  | 1.0078  |
| 12 | C  | -2.9602 | -4.5922 | -0.6260 | 6.00  | 4.00  | 12.0000 |
| 13 | C  | -2.7025 | -0.9620 | -0.2913 | 6.00  | 4.00  | 12.0000 |
| 14 | H  | -3.6112 | -0.7899 | -0.3792 | 1.00  | 1.00  | 1.0078  |
| 15 | C  | -1.4873 | 2.3612  | 0.2418  | 6.00  | 4.00  | 12.0000 |
| 16 | C  | -0.9149 | -2.6965 | -0.3774 | 6.00  | 4.00  | 12.0000 |
| 17 | C  | 5.0578  | 1.7757  | -0.2355 | 6.00  | 4.00  | 12.0000 |
| 18 | H  | 4.7874  | 2.6658  | -0.2324 | 1.00  | 1.00  | 1.0078  |
| 19 | C  | -1.8910 | 3.6384  | 0.6138  | 6.00  | 4.00  | 12.0000 |
| 20 | H  | -1.2601 | 4.3184  | 0.6910  | 1.00  | 1.00  | 1.0078  |
| 21 | C  | -3.7800 | 1.6419  | 0.4859  | 6.00  | 4.00  | 12.0000 |
| 22 | H  | -4.4168 | 0.9638  | 0.4648  | 1.00  | 1.00  | 1.0078  |
| 23 | C  | -2.2832 | -2.3110 | -0.4455 | 6.00  | 4.00  | 12.0000 |
| 24 | C  | 4.0991  | 0.7676  | -0.2127 | 6.00  | 4.00  | 12.0000 |
| 25 | C  | -0.6829 | -4.0922 | -0.5038 | 6.00  | 4.00  | 12.0000 |
| 26 | C  | 0.8229  | 2.7390  | -0.4155 | 6.00  | 4.00  | 12.0000 |
| 27 | H  | 0.7497  | 4.7668  | -0.2103 | 1.00  | 1.00  | 1.0078  |
| 28 | C  | 4.5383  | -0.5356 | -0.1549 | 6.00  | 4.00  | 12.0000 |
| 29 | H  | 3.9155  | -1.2231 | -0.1011 | 1.00  | 1.00  | 1.0078  |
| 30 | C  | -4.1657 | 2.9215  | 0.7929  | 6.00  | 4.00  | 12.0000 |
| 31 | H  | -5.0603 | 3.1181  | 0.9483  | 1.00  | 1.00  | 1.0078  |
| 32 | C  | -1.6569 | -5.0267 | -0.6127 | 6.00  | 4.00  | 12.0000 |
| 33 | H  | 0.2731  | -7.3855 | -1.1727 | 1.00  | 1.00  | 1.0078  |
| 34 | C  | -3.2198 | 3.9073  | 0.8691  | 6.00  | 4.00  | 12.0000 |
| 35 | H  | -3.4765 | 4.7717  | 1.0962  | 1.00  | 1.00  | 1.0078  |
| 36 | C  | 2.1564  | 2.2914  | -0.4673 | 6.00  | 4.00  | 12.0000 |
| 37 | H  | 2.7915  | 2.9293  | -0.7046 | 1.00  | 1.00  | 1.0078  |
| 38 | C  | 5.8827  | -0.8416 | -0.1753 | 6.00  | 4.00  | 12.0000 |
| 39 | H  | 6.1730  | -1.7265 | -0.1487 | 1.00  | 1.00  | 1.0078  |
| 40 | C  | 6.4000  | 1.4761  | -0.2625 | 6.00  | 4.00  | 12.0000 |
| 41 | H  | 7.0381  | 2.1511  | -0.2993 | 1.00  | 1.00  | 1.0078  |
| 42 | C  | 6.7669  | 0.1783  | -0.2339 | 6.00  | 4.00  | 12.0000 |
| 43 | C  | 0.5960  | 4.1405  | -0.9214 | 6.00  | 4.00  | 12.0000 |

|    |   |         |         |         |      |      |         |
|----|---|---------|---------|---------|------|------|---------|
| 44 | H | -3.7678 | -5.3077 | -0.6730 | 1.00 | 1.00 | 1.0078  |
| 45 | H | 8.4044  | -2.0639 | -0.5145 | 1.00 | 1.00 | 1.0078  |
| 46 | O | 8.1284  | -0.1366 | -0.3182 | 8.00 | 6.00 | 15.9949 |
| 47 | C | 8.2794  | -1.1829 | -1.1087 | 6.00 | 4.00 | 12.0000 |
| 48 | H | 7.4132  | -1.2901 | -1.7277 | 1.00 | 1.00 | 1.0078  |
| 49 | H | 9.1429  | -1.0427 | -1.7248 | 1.00 | 1.00 | 1.0078  |
| 50 | O | -1.3451 | -6.3882 | -0.7082 | 8.00 | 6.00 | 15.9949 |
| 51 | C | -0.2916 | -6.5339 | -1.4901 | 6.00 | 4.00 | 12.0000 |
| 52 | H | -0.6143 | -6.6763 | -2.5003 | 1.00 | 1.00 | 1.0078  |
| 53 | H | 0.3202  | -5.6581 | -1.4312 | 1.00 | 1.00 | 1.0078  |
| 54 | H | 0.3258  | -4.4778 | -0.5184 | 1.00 | 1.00 | 1.0078  |

**Table S10.** Computed geometry optimization parameters of compound **6**

| ATOMS | X          | Y | Z | CHARGE      |         |
|-------|------------|---|---|-------------|---------|
|       | (Angstrom) |   |   | Nucl + Core | At.Mass |

|    |    |         |         |         |       |       |         |
|----|----|---------|---------|---------|-------|-------|---------|
| 1  | Ni | 0.0000  | 0.0000  | 0.0000  | 28.00 | 10.00 | 57.9353 |
| 2  | N  | -0.1620 | 1.9511  | 0.0000  | 7.00  | 5.00  | 14.0031 |
| 3  | O  | 0.0913  | -1.9050 | -0.1822 | 8.00  | 6.00  | 15.9949 |
| 4  | H  | 1.2017  | 4.3232  | -1.6436 | 1.00  | 1.00  | 1.0078  |
| 5  | O  | 1.9013  | 0.0000  | 0.0000  | 8.00  | 6.00  | 15.9949 |
| 6  | H  | -0.3079 | 4.2245  | -1.2335 | 1.00  | 1.00  | 1.0078  |
| 7  | N  | -1.9372 | 0.0444  | -0.0408 | 7.00  | 5.00  | 14.0031 |
| 8  | C  | 2.6330  | 1.0328  | -0.2118 | 6.00  | 4.00  | 12.0000 |
| 9  | C  | -2.4592 | 1.3426  | 0.2066  | 6.00  | 4.00  | 12.0000 |
| 10 | C  | -3.2849 | -3.2908 | -0.5825 | 6.00  | 4.00  | 12.0000 |
| 11 | H  | -4.1773 | -3.0338 | -0.6441 | 1.00  | 1.00  | 1.0078  |
| 12 | C  | -2.9602 | -4.5922 | -0.6260 | 6.00  | 4.00  | 12.0000 |
| 13 | C  | -2.7025 | -0.9620 | -0.2913 | 6.00  | 4.00  | 12.0000 |
| 14 | H  | -3.6112 | -0.7899 | -0.3792 | 1.00  | 1.00  | 1.0078  |
| 15 | C  | -1.4873 | 2.3612  | 0.2418  | 6.00  | 4.00  | 12.0000 |
| 16 | C  | -0.9149 | -2.6965 | -0.3774 | 6.00  | 4.00  | 12.0000 |
| 17 | H  | 3.2810  | -1.0753 | -0.0127 | 1.00  | 1.00  | 1.0078  |
| 18 | O  | -4.0070 | -5.5198 | -0.6869 | 8.00  | 6.00  | 15.9949 |
| 19 | C  | -1.8910 | 3.6384  | 0.6138  | 6.00  | 4.00  | 12.0000 |
| 20 | H  | -1.2601 | 4.3184  | 0.6910  | 1.00  | 1.00  | 1.0078  |
| 21 | C  | -3.7800 | 1.6419  | 0.4859  | 6.00  | 4.00  | 12.0000 |
| 22 | H  | -4.4168 | 0.9638  | 0.4648  | 1.00  | 1.00  | 1.0078  |
| 23 | C  | -2.2832 | -2.3110 | -0.4455 | 6.00  | 4.00  | 12.0000 |
| 24 | H  | 0.3258  | -4.4778 | -0.5184 | 1.00  | 1.00  | 1.0078  |
| 25 | C  | -0.6829 | -4.0922 | -0.5038 | 6.00  | 4.00  | 12.0000 |
| 26 | C  | 0.8229  | 2.7390  | -0.4155 | 6.00  | 4.00  | 12.0000 |
| 27 | H  | 0.7497  | 4.7668  | -0.2103 | 1.00  | 1.00  | 1.0078  |
| 28 | C  | 0.5960  | 4.1405  | -0.9214 | 6.00  | 4.00  | 12.0000 |
| 29 | H  | -5.3810 | -4.2977 | -0.0179 | 1.00  | 1.00  | 1.0078  |
| 30 | C  | -4.1657 | 2.9215  | 0.7929  | 6.00  | 4.00  | 12.0000 |
| 31 | H  | -5.0603 | 3.1181  | 0.9483  | 1.00  | 1.00  | 1.0078  |
| 32 | C  | -1.6569 | -5.0267 | -0.6127 | 6.00  | 4.00  | 12.0000 |
| 33 | C  | -5.1414 | -4.8750 | -0.8863 | 6.00  | 4.00  | 12.0000 |
| 34 | C  | -3.2198 | 3.9073  | 0.8691  | 6.00  | 4.00  | 12.0000 |
| 35 | H  | -3.4765 | 4.7717  | 1.0962  | 1.00  | 1.00  | 1.0078  |
| 36 | C  | 2.1564  | 2.2914  | -0.4673 | 6.00  | 4.00  | 12.0000 |
| 37 | H  | 2.7915  | 2.9293  | -0.7046 | 1.00  | 1.00  | 1.0078  |
| 38 | H  | -5.0385 | -4.2245 | -1.7297 | 1.00  | 1.00  | 1.0078  |
| 39 | H  | -5.9244 | -5.5800 | -1.0731 | 1.00  | 1.00  | 1.0078  |
| 40 | Fe | 5.1474  | 0.2896  | 1.6091  | 26.00 | 8.00  | 55.9349 |
| 41 | C  | 6.3714  | 0.2824  | 3.2451  | 6.00  | 4.00  | 12.0000 |
| 42 | C  | 6.3576  | 0.2779  | -0.0270 | 6.00  | 4.00  | 12.0000 |
| 43 | C  | 5.5325  | -0.8722 | 3.2451  | 6.00  | 4.00  | 12.0000 |

|    |   |         |         |         |      |      |         |
|----|---|---------|---------|---------|------|------|---------|
| 44 | C | 5.5325  | 1.4370  | 3.2451  | 6.00 | 4.00 | 12.0000 |
| 45 | C | 5.5187  | 1.4326  | -0.0270 | 6.00 | 4.00 | 12.0000 |
| 46 | C | 5.5187  | -0.8767 | -0.0270 | 6.00 | 4.00 | 12.0000 |
| 47 | C | 4.1751  | -0.4312 | 3.2451  | 6.00 | 4.00 | 12.0000 |
| 48 | C | 4.1751  | 0.9960  | 3.2451  | 6.00 | 4.00 | 12.0000 |
| 49 | C | 4.1614  | 0.9915  | -0.0270 | 6.00 | 4.00 | 12.0000 |
| 50 | C | 4.1614  | -0.4357 | -0.0270 | 6.00 | 4.00 | 12.0000 |
| 51 | H | 7.4595  | 0.2824  | 3.2309  | 1.00 | 1.00 | 1.0078  |
| 52 | H | 7.4458  | 0.2779  | -0.0127 | 1.00 | 1.00 | 1.0078  |
| 53 | H | 5.8687  | -1.9071 | 3.2309  | 1.00 | 1.00 | 1.0078  |
| 54 | H | 5.8687  | 2.4720  | 3.2309  | 1.00 | 1.00 | 1.0078  |
| 55 | H | 5.8550  | 2.4675  | -0.0127 | 1.00 | 1.00 | 1.0078  |
| 56 | H | 5.8550  | -1.9116 | -0.0127 | 1.00 | 1.00 | 1.0078  |
| 57 | H | 3.2948  | -1.0708 | 3.2309  | 1.00 | 1.00 | 1.0078  |
| 58 | H | 3.2948  | 1.6356  | 3.2309  | 1.00 | 1.00 | 1.0078  |
| 59 | H | -1.4050 | -6.0744 | -0.6857 | 1.00 | 1.00 | 1.0078  |

**Table S11.** Computed geometry optimization parameters of compound **7**

| ATOMS | X          | Y | Z | CHARGE      |         |
|-------|------------|---|---|-------------|---------|
|       | (Angstrom) |   |   | Nucl + Core | At.Mass |



|    |    |         |         |         |       |       |         |
|----|----|---------|---------|---------|-------|-------|---------|
| 1  | Cu | -0.0848 | -0.0551 | 0.1005  | 29.00 | 11.00 | 62.9296 |
| 2  | N  | -0.1728 | 1.9416  | 0.0369  | 7.00  | 5.00  | 14.0031 |
| 3  | O  | -0.0875 | -2.0111 | 0.0624  | 8.00  | 6.00  | 15.9949 |
| 4  | H  | 1.5579  | 4.3226  | -1.5404 | 1.00  | 1.00  | 1.0078  |
| 5  | O  | 1.8609  | -0.1210 | 0.2751  | 8.00  | 6.00  | 15.9949 |
| 6  | H  | -0.2149 | 4.2483  | -1.3651 | 1.00  | 1.00  | 1.0078  |
| 7  | N  | -2.0446 | 0.0705  | -0.0324 | 7.00  | 5.00  | 14.0031 |
| 8  | C  | 2.6282  | 0.8684  | -0.0133 | 6.00  | 4.00  | 12.0000 |
| 9  | C  | -2.4998 | 1.3844  | 0.1550  | 6.00  | 4.00  | 12.0000 |
| 10 | C  | -3.4927 | -3.2438 | -0.7197 | 6.00  | 4.00  | 12.0000 |
| 11 | H  | -4.4966 | -2.8568 | -0.8887 | 1.00  | 1.00  | 1.0078  |
| 12 | C  | -3.2337 | -4.5947 | -0.7874 | 6.00  | 4.00  | 12.0000 |
| 13 | C  | -2.8312 | -0.9406 | -0.3209 | 6.00  | 4.00  | 12.0000 |
| 14 | H  | -3.8920 | -0.7326 | -0.5093 | 1.00  | 1.00  | 1.0078  |
| 15 | C  | -1.4838 | 2.3867  | 0.2204  | 6.00  | 4.00  | 12.0000 |
| 16 | C  | -1.1098 | -2.7698 | -0.1881 | 6.00  | 4.00  | 12.0000 |
| 17 | H  | 4.0063  | -1.6760 | 0.0899  | 1.00  | 1.00  | 1.0078  |
| 18 | O  | -4.1582 | -5.5764 | -1.0687 | 8.00  | 6.00  | 15.9949 |
| 19 | C  | -1.8780 | 3.6978  | 0.5580  | 6.00  | 4.00  | 12.0000 |
| 20 | H  | -1.1261 | 4.4633  | 0.7133  | 1.00  | 1.00  | 1.0078  |
| 21 | C  | -3.8440 | 1.7321  | 0.3499  | 6.00  | 4.00  | 12.0000 |
| 22 | H  | -4.6110 | 0.9604  | 0.3267  | 1.00  | 1.00  | 1.0078  |
| 23 | C  | -2.4572 | -2.3045 | -0.4140 | 6.00  | 4.00  | 12.0000 |
| 24 | H  | 0.1140  | -4.5400 | -0.0758 | 1.00  | 1.00  | 1.0078  |
| 25 | C  | -0.8985 | -4.1836 | -0.2560 | 6.00  | 4.00  | 12.0000 |
| 26 | C  | 0.8849  | 2.6762  | -0.3381 | 6.00  | 4.00  | 12.0000 |
| 27 | H  | 0.7957  | 4.8310  | -0.0289 | 1.00  | 1.00  | 1.0078  |
| 28 | C  | 0.7394  | 4.1003  | -0.8476 | 6.00  | 4.00  | 12.0000 |
| 29 | H  | -5.9176 | -4.6348 | -0.4341 | 1.00  | 1.00  | 1.0078  |
| 30 | C  | -4.2096 | 3.0468  | 0.6227  | 6.00  | 4.00  | 12.0000 |
| 31 | H  | -5.2572 | 3.2979  | 0.7812  | 1.00  | 1.00  | 1.0078  |
| 32 | C  | -1.9158 | -5.0591 | -0.5469 | 6.00  | 4.00  | 12.0000 |
| 33 | C  | -5.4929 | -5.1475 | -1.3126 | 6.00  | 4.00  | 12.0000 |
| 34 | C  | -3.2187 | 4.0258  | 0.7420  | 6.00  | 4.00  | 12.0000 |
| 35 | H  | -3.4875 | 5.0482  | 1.0045  | 1.00  | 1.00  | 1.0078  |
| 36 | C  | 2.1953  | 2.1717  | -0.3420 | 6.00  | 4.00  | 12.0000 |
| 37 | H  | 2.9667  | 2.8607  | -0.6757 | 1.00  | 1.00  | 1.0078  |
| 38 | H  | -5.5464 | -4.4746 | -2.1839 | 1.00  | 1.00  | 1.0078  |
| 39 | H  | -6.0706 | -6.0539 | -1.5178 | 1.00  | 1.00  | 1.0078  |
| 40 | Fe | 5.3327  | 0.3475  | 1.5837  | 26.00 | 8.00  | 55.9349 |
| 41 | C  | 6.5608  | 0.8583  | 3.1822  | 6.00  | 4.00  | 12.0000 |
| 42 | C  | 6.3911  | 0.6930  | -0.1717 | 6.00  | 4.00  | 12.0000 |
| 43 | C  | 6.1805  | -0.5215 | 3.2702  | 6.00  | 4.00  | 12.0000 |

|    |   |         |         |         |      |      |         |
|----|---|---------|---------|---------|------|------|---------|
| 44 | C | 5.3650  | 1.6489  | 3.2100  | 6.00 | 4.00 | 12.0000 |
| 45 | C | 5.1896  | 1.4680  | -0.1488 | 6.00 | 4.00 | 12.0000 |
| 46 | C | 6.0310  | -0.6915 | -0.0764 | 6.00 | 4.00 | 12.0000 |
| 47 | C | 4.7500  | -0.5829 | 3.3518  | 6.00 | 4.00 | 12.0000 |
| 48 | C | 4.2487  | 0.7580  | 3.3169  | 6.00 | 4.00 | 12.0000 |
| 49 | C | 4.0707  | 0.5592  | -0.0555 | 6.00 | 4.00 | 12.0000 |
| 50 | C | 4.6078  | -0.7777 | 0.0071  | 6.00 | 4.00 | 12.0000 |
| 51 | H | 7.5751  | 1.2368  | 3.0993  | 1.00 | 1.00 | 1.0078  |
| 52 | H | 7.4006  | 1.0875  | -0.2335 | 1.00 | 1.00 | 1.0078  |
| 53 | H | 6.8569  | -1.3709 | 3.2645  | 1.00 | 1.00 | 1.0078  |
| 54 | H | 5.3135  | 2.7319  | 3.1514  | 1.00 | 1.00 | 1.0078  |
| 55 | H | 5.1361  | 2.5510  | -0.1906 | 1.00 | 1.00 | 1.0078  |
| 56 | H | 6.7222  | -1.5284 | -0.0559 | 1.00 | 1.00 | 1.0078  |
| 57 | H | 4.1488  | -1.4846 | 3.4118  | 1.00 | 1.00 | 1.0078  |
| 58 | H | 3.2014  | 1.0447  | 3.3330  | 1.00 | 1.00 | 1.0078  |
| 59 | H | -1.7316 | -6.1322 | -0.5996 | 1.00 | 1.00 | 1.0078  |

**Table S12.** Computed geometry optimization parameters of compound **8**

| ATOMS | X          | Y | Z | CHARGE      |         |
|-------|------------|---|---|-------------|---------|
|       | (Angstrom) |   |   | Nucl + Core | At.Mass |

|    |    |         |         |         |       |       |         |
|----|----|---------|---------|---------|-------|-------|---------|
| 1  | Ni | 0.0000  | 0.0000  | 0.0000  | 28.00 | 10.00 | 57.9353 |
| 2  | N  | -0.1620 | 1.9511  | 0.0000  | 7.00  | 5.00  | 14.0031 |
| 3  | O  | 0.0913  | -1.9050 | -0.1822 | 8.00  | 6.00  | 15.9949 |
| 4  | H  | 1.2017  | 4.3232  | -1.6436 | 1.00  | 1.00  | 1.0078  |
| 5  | O  | 1.9013  | 0.0000  | 0.0000  | 8.00  | 6.00  | 15.9949 |
| 6  | H  | -0.3079 | 4.2245  | -1.2335 | 1.00  | 1.00  | 1.0078  |
| 7  | N  | -1.9372 | 0.0444  | -0.0408 | 7.00  | 5.00  | 14.0031 |
| 8  | C  | 2.6330  | 1.0328  | -0.2118 | 6.00  | 4.00  | 12.0000 |
| 9  | C  | -2.4592 | 1.3426  | 0.2066  | 6.00  | 4.00  | 12.0000 |
| 10 | C  | -3.2849 | -3.2908 | -0.5825 | 6.00  | 4.00  | 12.0000 |
| 11 | H  | -4.1773 | -3.0338 | -0.6441 | 1.00  | 1.00  | 1.0078  |
| 12 | C  | -2.9602 | -4.5922 | -0.6260 | 6.00  | 4.00  | 12.0000 |
| 13 | C  | -2.7025 | -0.9620 | -0.2913 | 6.00  | 4.00  | 12.0000 |
| 14 | H  | -3.6112 | -0.7899 | -0.3792 | 1.00  | 1.00  | 1.0078  |
| 15 | C  | -1.4873 | 2.3612  | 0.2418  | 6.00  | 4.00  | 12.0000 |
| 16 | C  | -0.9149 | -2.6965 | -0.3774 | 6.00  | 4.00  | 12.0000 |
| 17 | C  | 5.0578  | 1.7757  | -0.2355 | 6.00  | 4.00  | 12.0000 |
| 18 | H  | 4.7874  | 2.6658  | -0.2324 | 1.00  | 1.00  | 1.0078  |
| 19 | C  | -1.8910 | 3.6384  | 0.6138  | 6.00  | 4.00  | 12.0000 |
| 20 | H  | -1.2601 | 4.3184  | 0.6910  | 1.00  | 1.00  | 1.0078  |
| 21 | C  | -3.7800 | 1.6419  | 0.4859  | 6.00  | 4.00  | 12.0000 |
| 22 | H  | -4.4168 | 0.9638  | 0.4648  | 1.00  | 1.00  | 1.0078  |
| 23 | C  | -2.2832 | -2.3110 | -0.4455 | 6.00  | 4.00  | 12.0000 |
| 24 | C  | 4.0991  | 0.7676  | -0.2127 | 6.00  | 4.00  | 12.0000 |
| 25 | C  | -0.6829 | -4.0922 | -0.5038 | 6.00  | 4.00  | 12.0000 |
| 26 | C  | 0.8229  | 2.7390  | -0.4155 | 6.00  | 4.00  | 12.0000 |
| 27 | H  | 0.7497  | 4.7668  | -0.2103 | 1.00  | 1.00  | 1.0078  |
| 28 | C  | 4.5383  | -0.5356 | -0.1549 | 6.00  | 4.00  | 12.0000 |
| 29 | H  | 3.9155  | -1.2231 | -0.1011 | 1.00  | 1.00  | 1.0078  |
| 30 | C  | -4.1657 | 2.9215  | 0.7929  | 6.00  | 4.00  | 12.0000 |
| 31 | H  | -5.0603 | 3.1181  | 0.9483  | 1.00  | 1.00  | 1.0078  |
| 32 | C  | -1.6569 | -5.0267 | -0.6127 | 6.00  | 4.00  | 12.0000 |
| 33 | F  | 0.6246  | -4.5921 | -0.5228 | 9.00  | 7.00  | 18.9984 |
| 34 | C  | -3.2198 | 3.9073  | 0.8691  | 6.00  | 4.00  | 12.0000 |
| 35 | H  | -3.4765 | 4.7717  | 1.0962  | 1.00  | 1.00  | 1.0078  |
| 36 | C  | 2.1564  | 2.2914  | -0.4673 | 6.00  | 4.00  | 12.0000 |
| 37 | H  | 2.7915  | 2.9293  | -0.7046 | 1.00  | 1.00  | 1.0078  |
| 38 | C  | 5.8827  | -0.8416 | -0.1753 | 6.00  | 4.00  | 12.0000 |
| 39 | H  | 6.1730  | -1.7265 | -0.1487 | 1.00  | 1.00  | 1.0078  |
| 40 | C  | 6.4000  | 1.4761  | -0.2625 | 6.00  | 4.00  | 12.0000 |
| 41 | H  | 7.0381  | 2.1511  | -0.2993 | 1.00  | 1.00  | 1.0078  |
| 42 | C  | 6.7669  | 0.1783  | -0.2339 | 6.00  | 4.00  | 12.0000 |
| 43 | C  | 0.5960  | 4.1405  | -0.9214 | 6.00  | 4.00  | 12.0000 |

|    |   |         |         |         |      |      |         |
|----|---|---------|---------|---------|------|------|---------|
| 44 | F | -4.0594 | -5.5661 | -0.6900 | 9.00 | 7.00 | 18.9984 |
| 45 | H | -1.4493 | -5.9331 | -0.6763 | 1.00 | 1.00 | 1.0078  |
| 46 | F | 8.1284  | -0.1366 | -0.3182 | 9.00 | 7.00 | 18.9984 |

**Table S13.** Computed geometry optimization parameters of compound **9**

| ATOMS | X          | Y | Z | CHARGE      |         |
|-------|------------|---|---|-------------|---------|
|       | (Angstrom) |   |   | Nucl + Core | At.Mass |

|    |    |         |         |         |       |       |         |
|----|----|---------|---------|---------|-------|-------|---------|
| 1  | Cu | 0.0000  | 0.0000  | 0.0000  | 29.00 | 11.00 | 62.9296 |
| 2  | N  | -0.1620 | 1.9511  | 0.0000  | 7.00  | 5.00  | 14.0031 |
| 3  | O  | 0.0913  | -1.9050 | -0.1822 | 8.00  | 6.00  | 15.9949 |
| 4  | H  | 1.2017  | 4.3232  | -1.6436 | 1.00  | 1.00  | 1.0078  |
| 5  | O  | 1.9013  | 0.0000  | 0.0000  | 8.00  | 6.00  | 15.9949 |
| 6  | H  | -0.3079 | 4.2245  | -1.2335 | 1.00  | 1.00  | 1.0078  |
| 7  | N  | -1.9372 | 0.0444  | -0.0408 | 7.00  | 5.00  | 14.0031 |
| 8  | C  | 2.6330  | 1.0328  | -0.2118 | 6.00  | 4.00  | 12.0000 |
| 9  | C  | -2.4592 | 1.3426  | 0.2066  | 6.00  | 4.00  | 12.0000 |
| 10 | C  | -3.2849 | -3.2908 | -0.5825 | 6.00  | 4.00  | 12.0000 |
| 11 | H  | -4.1773 | -3.0338 | -0.6441 | 1.00  | 1.00  | 1.0078  |
| 12 | C  | -2.9602 | -4.5922 | -0.6260 | 6.00  | 4.00  | 12.0000 |
| 13 | C  | -2.7025 | -0.9620 | -0.2913 | 6.00  | 4.00  | 12.0000 |
| 14 | H  | -3.6112 | -0.7899 | -0.3792 | 1.00  | 1.00  | 1.0078  |
| 15 | C  | -1.4873 | 2.3612  | 0.2418  | 6.00  | 4.00  | 12.0000 |
| 16 | C  | -0.9149 | -2.6965 | -0.3774 | 6.00  | 4.00  | 12.0000 |
| 17 | C  | 5.0578  | 1.7757  | -0.2355 | 6.00  | 4.00  | 12.0000 |
| 18 | H  | 4.7874  | 2.6658  | -0.2324 | 1.00  | 1.00  | 1.0078  |
| 19 | C  | -1.8910 | 3.6384  | 0.6138  | 6.00  | 4.00  | 12.0000 |
| 20 | H  | -1.2601 | 4.3184  | 0.6910  | 1.00  | 1.00  | 1.0078  |
| 21 | C  | -3.7800 | 1.6419  | 0.4859  | 6.00  | 4.00  | 12.0000 |
| 22 | H  | -4.4168 | 0.9638  | 0.4648  | 1.00  | 1.00  | 1.0078  |
| 23 | C  | -2.2832 | -2.3110 | -0.4455 | 6.00  | 4.00  | 12.0000 |
| 24 | C  | 4.0991  | 0.7676  | -0.2127 | 6.00  | 4.00  | 12.0000 |
| 25 | C  | -0.6829 | -4.0922 | -0.5038 | 6.00  | 4.00  | 12.0000 |
| 26 | C  | 0.8229  | 2.7390  | -0.4155 | 6.00  | 4.00  | 12.0000 |
| 27 | H  | 0.7497  | 4.7668  | -0.2103 | 1.00  | 1.00  | 1.0078  |
| 28 | C  | 4.5383  | -0.5356 | -0.1549 | 6.00  | 4.00  | 12.0000 |
| 29 | H  | 3.9155  | -1.2231 | -0.1011 | 1.00  | 1.00  | 1.0078  |
| 30 | C  | -4.1657 | 2.9215  | 0.7929  | 6.00  | 4.00  | 12.0000 |
| 31 | H  | -5.0603 | 3.1181  | 0.9483  | 1.00  | 1.00  | 1.0078  |
| 32 | C  | -1.6569 | -5.0267 | -0.6127 | 6.00  | 4.00  | 12.0000 |
| 33 | F  | 0.6246  | -4.5921 | -0.5228 | 9.00  | 7.00  | 18.9984 |
| 34 | C  | -3.2198 | 3.9073  | 0.8691  | 6.00  | 4.00  | 12.0000 |
| 35 | H  | -3.4765 | 4.7717  | 1.0962  | 1.00  | 1.00  | 1.0078  |
| 36 | C  | 2.1564  | 2.2914  | -0.4673 | 6.00  | 4.00  | 12.0000 |
| 37 | H  | 2.7915  | 2.9293  | -0.7046 | 1.00  | 1.00  | 1.0078  |
| 38 | C  | 5.8827  | -0.8416 | -0.1753 | 6.00  | 4.00  | 12.0000 |
| 39 | H  | 6.1730  | -1.7265 | -0.1487 | 1.00  | 1.00  | 1.0078  |
| 40 | C  | 6.4000  | 1.4761  | -0.2625 | 6.00  | 4.00  | 12.0000 |
| 41 | H  | 7.0381  | 2.1511  | -0.2993 | 1.00  | 1.00  | 1.0078  |
| 42 | C  | 6.7669  | 0.1783  | -0.2339 | 6.00  | 4.00  | 12.0000 |
| 43 | C  | 0.5960  | 4.1405  | -0.9214 | 6.00  | 4.00  | 12.0000 |

|    |   |         |         |         |      |      |         |
|----|---|---------|---------|---------|------|------|---------|
| 44 | F | -4.0594 | -5.5661 | -0.6900 | 9.00 | 7.00 | 18.9984 |
| 45 | H | -1.4493 | -5.9331 | -0.6763 | 1.00 | 1.00 | 1.0078  |
| 46 | F | 8.1284  | -0.1366 | -0.3182 | 9.00 | 7.00 | 18.9984 |

**Table S14.** Computed geometry optimization parameters of compound **10**

| ATOMS | X          | Y | Z | CHARGE      |         |
|-------|------------|---|---|-------------|---------|
|       | (Angstrom) |   |   | Nucl + Core | At.Mass |

|    |    |         |         |         |       |       |         |
|----|----|---------|---------|---------|-------|-------|---------|
| 1  | Ni | -0.0718 | 0.0949  | -0.0380 | 28.00 | 10.00 | 57.9353 |
| 2  | N  | -0.1942 | 1.9874  | -0.0589 | 7.00  | 5.00  | 14.0031 |
| 3  | O  | 0.0813  | -1.7790 | -0.1172 | 8.00  | 6.00  | 15.9949 |
| 4  | H  | 1.3520  | 4.4664  | -1.6625 | 1.00  | 1.00  | 1.0078  |
| 5  | O  | 1.8002  | 0.0334  | -0.0074 | 8.00  | 6.00  | 15.9949 |
| 6  | H  | -0.3978 | 4.3546  | -1.3517 | 1.00  | 1.00  | 1.0078  |
| 7  | N  | -1.9431 | 0.1089  | -0.0101 | 7.00  | 5.00  | 14.0031 |
| 8  | C  | 2.5832  | 1.0201  | -0.2648 | 6.00  | 4.00  | 12.0000 |
| 9  | C  | -2.4711 | 1.3975  | 0.2341  | 6.00  | 4.00  | 12.0000 |
| 10 | C  | -3.2386 | -3.2928 | -0.5021 | 6.00  | 4.00  | 12.0000 |
| 11 | H  | -4.2968 | -3.0443 | -0.5582 | 1.00  | 1.00  | 1.0078  |
| 12 | C  | -2.8586 | -4.6161 | -0.5998 | 6.00  | 4.00  | 12.0000 |
| 13 | C  | -2.7115 | -0.9409 | -0.1795 | 6.00  | 4.00  | 12.0000 |
| 14 | H  | -3.7935 | -0.7890 | -0.1972 | 1.00  | 1.00  | 1.0078  |
| 15 | C  | -1.4951 | 2.4220  | 0.2452  | 6.00  | 4.00  | 12.0000 |
| 16 | C  | -0.8724 | -2.6378 | -0.2569 | 6.00  | 4.00  | 12.0000 |
| 17 | C  | 5.0314  | 1.6798  | -0.1942 | 6.00  | 4.00  | 12.0000 |
| 18 | H  | 4.7588  | 2.7306  | -0.1192 | 1.00  | 1.00  | 1.0078  |
| 19 | C  | -1.8919 | 3.7142  | 0.6369  | 6.00  | 4.00  | 12.0000 |
| 20 | H  | -1.1570 | 4.5008  | 0.7614  | 1.00  | 1.00  | 1.0078  |
| 21 | C  | -3.8110 | 1.6833  | 0.5165  | 6.00  | 4.00  | 12.0000 |
| 22 | H  | -4.5577 | 0.8925  | 0.5234  | 1.00  | 1.00  | 1.0078  |
| 23 | C  | -2.2703 | -2.2823 | -0.3270 | 6.00  | 4.00  | 12.0000 |
| 24 | C  | 4.0334  | 0.6919  | -0.2594 | 6.00  | 4.00  | 12.0000 |
| 25 | C  | -0.5348 | -4.0247 | -0.3477 | 6.00  | 4.00  | 12.0000 |
| 26 | C  | 0.8153  | 2.7743  | -0.4716 | 6.00  | 4.00  | 12.0000 |
| 27 | H  | 0.7090  | 4.9143  | -0.0797 | 1.00  | 1.00  | 1.0078  |
| 28 | C  | 4.4224  | -0.6590 | -0.3075 | 6.00  | 4.00  | 12.0000 |
| 29 | H  | 3.6478  | -1.4216 | -0.3475 | 1.00  | 1.00  | 1.0078  |
| 30 | C  | -4.1939 | 2.9816  | 0.8422  | 6.00  | 4.00  | 12.0000 |
| 31 | H  | -5.2351 | 3.1966  | 1.0750  | 1.00  | 1.00  | 1.0078  |
| 32 | C  | -1.4976 | -4.9888 | -0.5197 | 6.00  | 4.00  | 12.0000 |
| 33 | H  | 0.5196  | -4.2865 | -0.2836 | 1.00  | 1.00  | 1.0078  |
| 34 | C  | -3.2278 | 3.9888  | 0.9198  | 6.00  | 4.00  | 12.0000 |
| 35 | H  | -3.5109 | 4.9943  | 1.2272  | 1.00  | 1.00  | 1.0078  |
| 36 | C  | 2.1352  | 2.3151  | -0.5689 | 6.00  | 4.00  | 12.0000 |
| 37 | H  | 2.8688  | 3.0333  | -0.9214 | 1.00  | 1.00  | 1.0078  |
| 38 | C  | 5.7667  | -1.0182 | -0.3087 | 6.00  | 4.00  | 12.0000 |
| 39 | H  | 6.0819  | -2.0590 | -0.3530 | 1.00  | 1.00  | 1.0078  |
| 40 | C  | 6.3810  | 1.3367  | -0.1914 | 6.00  | 4.00  | 12.0000 |
| 41 | H  | 7.1635  | 2.0906  | -0.1335 | 1.00  | 1.00  | 1.0078  |
| 42 | C  | 6.7222  | -0.0097 | -0.2529 | 6.00  | 4.00  | 12.0000 |
| 43 | C  | 0.5951  | 4.2084  | -0.9141 | 6.00  | 4.00  | 12.0000 |

|    |   |         |         |         |      |      |         |
|----|---|---------|---------|---------|------|------|---------|
| 44 | O | -5.0662 | -5.2832 | -0.8399 | 8.00 | 6.00 | 15.9949 |
| 45 | H | -1.2401 | -6.0423 | -0.5967 | 1.00 | 1.00 | 1.0078  |
| 46 | F | 8.0374  | -0.3506 | -0.2526 | 9.00 | 7.00 | 18.9984 |
| 47 | N | -3.8794 | -5.6432 | -0.7787 | 7.00 | 5.00 | 14.0031 |
| 48 | O | -3.5012 | -6.8224 | -0.8585 | 8.00 | 6.00 | 15.9949 |

**Table S15.** Computed geometry optimization parameters of compound **11**

| ATOMS | X          | Y | Z | CHARGE      |         |
|-------|------------|---|---|-------------|---------|
|       | (Angstrom) |   |   | Nucl + Core | At.Mass |



|    |    |         |         |         |       |       |         |
|----|----|---------|---------|---------|-------|-------|---------|
| 1  | Cu | 0.0000  | 0.0000  | 0.0000  | 29.00 | 11.00 | 62.9296 |
| 2  | N  | -0.1620 | 1.9511  | 0.0000  | 7.00  | 5.00  | 14.0031 |
| 3  | O  | 0.0913  | -1.9050 | -0.1822 | 8.00  | 6.00  | 15.9949 |
| 4  | H  | 1.2017  | 4.3232  | -1.6436 | 1.00  | 1.00  | 1.0078  |
| 5  | O  | 1.9013  | 0.0000  | 0.0000  | 8.00  | 6.00  | 15.9949 |
| 6  | H  | -0.3079 | 4.2245  | -1.2335 | 1.00  | 1.00  | 1.0078  |
| 7  | N  | -1.9372 | 0.0444  | -0.0408 | 7.00  | 5.00  | 14.0031 |
| 8  | C  | 2.6330  | 1.0328  | -0.2118 | 6.00  | 4.00  | 12.0000 |
| 9  | C  | -2.4592 | 1.3426  | 0.2066  | 6.00  | 4.00  | 12.0000 |
| 10 | C  | -3.2849 | -3.2908 | -0.5825 | 6.00  | 4.00  | 12.0000 |
| 11 | H  | -4.1773 | -3.0338 | -0.6441 | 1.00  | 1.00  | 1.0078  |
| 12 | C  | -2.9602 | -4.5922 | -0.6260 | 6.00  | 4.00  | 12.0000 |
| 13 | C  | -2.7025 | -0.9620 | -0.2913 | 6.00  | 4.00  | 12.0000 |
| 14 | H  | -3.6112 | -0.7899 | -0.3792 | 1.00  | 1.00  | 1.0078  |
| 15 | C  | -1.4873 | 2.3612  | 0.2418  | 6.00  | 4.00  | 12.0000 |
| 16 | C  | -0.9149 | -2.6965 | -0.3774 | 6.00  | 4.00  | 12.0000 |
| 17 | C  | 5.0578  | 1.7757  | -0.2355 | 6.00  | 4.00  | 12.0000 |
| 18 | H  | 4.7874  | 2.6658  | -0.2324 | 1.00  | 1.00  | 1.0078  |
| 19 | C  | -1.8910 | 3.6384  | 0.6138  | 6.00  | 4.00  | 12.0000 |
| 20 | H  | -1.2601 | 4.3184  | 0.6910  | 1.00  | 1.00  | 1.0078  |
| 21 | C  | -3.7800 | 1.6419  | 0.4859  | 6.00  | 4.00  | 12.0000 |
| 22 | H  | -4.4168 | 0.9638  | 0.4648  | 1.00  | 1.00  | 1.0078  |
| 23 | C  | -2.2832 | -2.3110 | -0.4455 | 6.00  | 4.00  | 12.0000 |
| 24 | C  | 4.0991  | 0.7676  | -0.2127 | 6.00  | 4.00  | 12.0000 |
| 25 | C  | -0.6829 | -4.0922 | -0.5038 | 6.00  | 4.00  | 12.0000 |
| 26 | C  | 0.8229  | 2.7390  | -0.4155 | 6.00  | 4.00  | 12.0000 |
| 27 | H  | 0.7497  | 4.7668  | -0.2103 | 1.00  | 1.00  | 1.0078  |
| 28 | C  | 4.5383  | -0.5356 | -0.1549 | 6.00  | 4.00  | 12.0000 |
| 29 | H  | 3.9155  | -1.2231 | -0.1011 | 1.00  | 1.00  | 1.0078  |
| 30 | C  | -4.1657 | 2.9215  | 0.7929  | 6.00  | 4.00  | 12.0000 |
| 31 | H  | -5.0603 | 3.1181  | 0.9483  | 1.00  | 1.00  | 1.0078  |
| 32 | C  | -1.6569 | -5.0267 | -0.6127 | 6.00  | 4.00  | 12.0000 |
| 33 | H  | 0.3258  | -4.4778 | -0.5184 | 1.00  | 1.00  | 1.0078  |
| 34 | C  | -3.2198 | 3.9073  | 0.8691  | 6.00  | 4.00  | 12.0000 |
| 35 | H  | -3.4765 | 4.7717  | 1.0962  | 1.00  | 1.00  | 1.0078  |
| 36 | C  | 2.1564  | 2.2914  | -0.4673 | 6.00  | 4.00  | 12.0000 |
| 37 | H  | 2.7915  | 2.9293  | -0.7046 | 1.00  | 1.00  | 1.0078  |
| 38 | C  | 5.8827  | -0.8416 | -0.1753 | 6.00  | 4.00  | 12.0000 |
| 39 | H  | 6.1730  | -1.7265 | -0.1487 | 1.00  | 1.00  | 1.0078  |
| 40 | C  | 6.4000  | 1.4761  | -0.2625 | 6.00  | 4.00  | 12.0000 |
| 41 | H  | 7.0381  | 2.1511  | -0.2993 | 1.00  | 1.00  | 1.0078  |
| 42 | C  | 6.7669  | 0.1783  | -0.2339 | 6.00  | 4.00  | 12.0000 |
| 43 | C  | 0.5960  | 4.1405  | -0.9214 | 6.00  | 4.00  | 12.0000 |

|    |   |         |         |         |      |      |         |
|----|---|---------|---------|---------|------|------|---------|
| 44 | O | -5.0329 | -5.3416 | -0.6469 | 8.00 | 6.00 | 15.9949 |
| 45 | H | -1.4493 | -5.9331 | -0.6763 | 1.00 | 1.00 | 1.0078  |
| 46 | F | 8.1284  | -0.1366 | -0.3182 | 9.00 | 7.00 | 18.9984 |
| 47 | N | -4.0594 | -5.5661 | -0.6900 | 7.00 | 5.00 | 14.0031 |
| 48 | O | -3.9493 | -6.5557 | -0.7833 | 8.00 | 6.00 | 15.9949 |

---
